# Supplementary material for: Aqueous solutions of facial amphiphilic carbohydrates as sustainable media for organocatalyzed direct aldol reactions
Source: Royal Society of Chemistry journal article supplement (doi:10.1039/c1gc16326d), 2011-12-12
Supplement: c1gc16326d.pdf [file c1gc16326d.pdf]

## Supporting Information

### Aqueous Solutions of Facial Amphiphilic Carbohydrates as Sustainable Media for Organocatalyzed Direct Aldol Reactions

Ana Bellomo, Richard Daniellou,\* and Daniel Plusquellec\*

[\*] Prof. Daniel Plusquellec, Dr. Richard Daniellou, Dr. Ana Bellomo, Ecole Nationale Supérieure de Chimie de Rennes, CNRS, UMR 6226, Avenue du Général Leclerc, CS 50837, 35708 Rennes, cedex 7, France, daniel.plusquellec@ensc-rennes.fr; richard.daniellou@ensc-rennes.fr.

| Table of Contents                                                       | Page |
|-------------------------------------------------------------------------|------|
| General Experimental and General Procedures                             | S-2  |
| Analytical Data for Aldol Products <b>3-7</b>                           | S-3  |
| References                                                              | S-7  |
| NMR Spectra for Compounds <b>3-7</b>                                    | S-8  |
| NMR Experiments with Europium salts                                     | S-37 |
| NMR Study for Interaction of <b>2d</b> , Cyclohexanone and the Catalyst | S-43 |

## General Experimental

All reactions were carried out in 10 mL round bottom flasks. The commercially available reagents (3-nitrobenzaldehyde, pyrrolidine, *rac*-pyrrolidinol, (*R*)-3-pyrrolidinol, L-proline, L-prolinol and all cyclohexanones) were purchased from Sigma–Aldrich, TCI and Acros and used without further purification. Nuclear magnetic resonance spectra were recorded on a Bruker Avance DPX-400 instrument. Chemical shifts ( $\delta$ ) are given in parts per million and coupling constants (*J*) are reported in Hertz. High-resolution mass spectra were performed on a ZabSpec TOF Micromass spectrometer (ESI + mode). Analytical TLC was performed on silica gel 60F-254 plates and visualized with UV light (254 nm) and/or anisaldehyde–H<sub>2</sub>SO<sub>4</sub>–AcOH as detecting agent. Flash column chromatography was performed on silica gel (Kieselgel 60, EM Reagents, 230–400 mesh). The diastereoselectivity of the reaction was determined by <sup>1</sup>H NMR spectroscopy of the crude product (after removal of the ketone excess by column chromatography). Measurement of the integration of the proton signal COCHCH(OH) in the two isomers indicated the ratios, while the coupling constant between the protons COCHCH(OH) and COCHCH(OH) of the products established the *anti*-aldol stereochemistry. In the case of 4-methylcyclohexanone, the 2,4-*trans* relationship was based on NOESY experiments. The enantiomeric excess of aldol products was determined by <sup>1</sup>H NMR experiments using Europium tris[3-(trifluoromethylhydroxymethylene)-(+)-camphorate]. All chiral carbonyl compounds were used in racemic forms, except for the 2,2-dimethyl-(*S*)-3-hydroxycyclohexanone.

### General procedure for the aldolization reaction

A mixture of 3-nitrobenzaldehyde (75.8 mg, 0.50 mmol), the ketone (2.50 mmol), the catalyst (2 mol%) and water (1.0 mL) was stirred vigorously at RT for the time indicated in Table 2. Once aldehyde consumption was complete (TLC analysis), the reaction mixture was quenched by adding saturated aqueous NH<sub>4</sub>Cl solution, and extracted with CH<sub>2</sub>Cl<sub>2</sub> several times. The combined organic layers were dried using MgSO<sub>4</sub>, concentrated, and the residue was purified by flash chromatography on silica gel (cyclohexane/ethyl acetate: 3/1) to give the aldol products (**3–7**) as yellow oils.

### General procedure for the aldolization reaction in the presence of the sugar media

A mixture of 3-nitrobenzaldehyde (75.8 mg, 0.50 mmol), ketone (2.50 mmol), the catalyst (2 mol%), the sugar derivative (1.0 M) and water (1.0 mL) was stirred vigorously at RT. After the time indicated in Table 2, the reaction mixture was quenched by adding saturated aqueous NH<sub>4</sub>Cl solution, and extracted with CH<sub>2</sub>Cl<sub>2</sub> several times. The combined organic layers were dried with MgSO<sub>4</sub>, concentrated, and the residue was purified by flash chromatography on silica gel (cyclohexane/ethyl acetate: 3/1) to give the aldol products (**3–7**) as yellow oils.



## Analytical data of aldol products 3-7:

### 2-(Hydroxy-(*m*-nitrophenyl)methyl)cyclohexanone (3)

**<sup>1</sup>H NMR** (400 MHz, CDCl<sub>3</sub>): δ= 8.17-8.14 (dt, 2H, *J* = 2.0 Hz, Ar*H*), 8.11-8.04 (ddd, 2H, *J* = 8.4, 2.4, 1.2 Hz, Ar*H*), 7.65-7.62 (m, 2H, Ar*H*), 7.48 (dt, 2H, *J* = 8.4 Hz, Ar*H*), 5.43 (*syn*; br s, 1H, CHCHOH), 4.88 (*anti*; dd, 1H, *J* = 8.4, 2.0 Hz, CHCHOH), 4.15 (*anti*; d, 1H, *J* = 2.8 Hz, CHCHOH), 3.32 (*syn*; d, 1H, *J* = 3.2 Hz, CHCHOH), 2.65-2.57 (*anti* and *syn*; m, 2H, CHCHOH), 2.47-2.41 (m, 2H, CHHC(O)), 2.39-2.30 (m, 2H, CHHC(O)), 2.10-2.02 (m, 2H, cyclohex-*H*), 1.84-1.75 (m, 2H, cyclohex-*H*), 1.72-1.56 (m, 6H, cyclohex-*H*), 1.40-1.29 (m, 2H, cyclohex-*H*) ppm.

**<sup>13</sup>C NMR** (100 MHz, CDCl<sub>3</sub>): δ= 214.7 (*syn*; C(O)), 213.9 (*anti*; C(O)), 148.1 (Ar C), 148.0 (Ar C), 143.9 (Ar C), 143.2 (Ar C), 133.1 (Ar CH), 131.9 (Ar CH), 129.1 (Ar CH), 128.9 (Ar CH), 122.6 (Ar CH), 121.9 (Ar CH), 121.8 (Ar CH), 120.7 (Ar CH), 73.7 (*anti*; CHCHOH), 69.7 (*syn*; CHCHOH), 56.9 (*anti*; CHCHOH), 56.6 (*syn*; CHCHOH), 42.5 (CH<sub>2</sub>), 42.4 (CH<sub>2</sub>), 30.5 (CH<sub>2</sub>), 27.6 (CH<sub>2</sub>), 27.5 (CH<sub>2</sub>), 25.7 (CH<sub>2</sub>), 24.5 (CH<sub>2</sub>), 24.4 (CH<sub>2</sub>) ppm.

**HRMS** (ESI): calculated for (C<sub>13</sub>H<sub>15</sub>NO<sub>4</sub>Na)<sup>+</sup> = [M+Na]<sup>+</sup>: *m/z* = 272.0898, found: *m/z* = 272.0897; calculated for (C<sub>14</sub>H<sub>19</sub>NO<sub>5</sub>Na)<sup>+</sup> = [M+Na+CH<sub>3</sub>OH]<sup>+</sup>: *m/z* = 304.1160; found: *m/z* = 304.1160.

### 2-(Hydroxy-(*m*-nitrophenyl)methyl)-6-methoxycyclohexanone (4)

**<sup>1</sup>H NMR** (400 MHz, CDCl<sub>3</sub>): δ= 8.21 (dd, 1H, *J* = 2.4, 2.0 Hz, Ar*H*), 8.17 (m, 2H, Ar*H*), 8.14 (ddd, 1H, *J* = 8.4, 2.0, 0.8 Hz, Ar*H*), 8.11 (ddd, 1H, *J* = 2.4, 1.2, 0.8 Hz, Ar*H*), 8.09 (ddd, 1H, *J* = 2.4, 1.2, 0.8 Hz, Ar*H*), 7.70-7.64 (m, 3H, Ar*H*), 7.54-7.49 (m, 3H, Ar*H*), 5.45 (*syn*; br s, 2H, CHCHOH), 4.98 (*anti*; d, 1H, *J* = 8.4 Hz, CHCHOH), 3.84 (m, 4H, *anti* CHCHOH and cyclohex-*H*-6), 3.47 and 3.46 (br s, 9H, CH<sub>3</sub>), 3.27 (br s, 2H, CHCHOH), 2.69-2.60 (*anti* and *syn*; m, 3H, CHCHOH), 2.39 (m, 3H, cyclohex-*H*-5), 1.88 (m, 3H, cyclohex-*H*-4), 1.79-1.68 (m, 4H, cyclohex-*H*-3), 1.66-1.61 (m, 5H, cyclohex-*H*-4), 1.36-1.24 (m, 4H, cyclohex-*H*-3) ppm.

**<sup>13</sup>C NMR** (100 MHz, CDCl<sub>3</sub>): δ= 211.7 (C(O)), 211.6 (C(O)), 148.3 (Ar C), 143.6 (Ar C), 143.1 (Ar C), 133.1 (Ar CH), 132.4 (Ar C), 131.9 (Ar CH), 130.8 (Ar CH), 129.3 (Ar CH), 129.2 (Ar CH), 128.8 (Ar CH), 122.9 (Ar CH), 122.2 (Ar CH), 121.8 (Ar CH), 120.7 (Ar CH), 84.6 (cyclohex-C-6), 84.5 (cyclohex-C-6), 73.2 (*anti*; CHCHOH), 69.6 (*syn*; CHCHOH), 58.1 (OCH<sub>3</sub>), 58.0 (OCH<sub>3</sub>), 56.7 (CHCHOH), 55.9 (CHCHOH), 34.8 (CH<sub>2</sub>), 34.7 (CH<sub>2</sub>), 31.1 (CH<sub>2</sub>), 30.3 (CH<sub>2</sub>), 30.2 (CH<sub>2</sub>), 29.6 (CH<sub>2</sub>), 28.9 (CH<sub>2</sub>), 26.1 (CH<sub>2</sub>), 23.7 (CH<sub>2</sub>), 22.9 (CH<sub>2</sub>), 22.6 (CH<sub>2</sub>), 22.4 (CH<sub>2</sub>) ppm.

**HRMS** (ESI): calculated for  $(C_{14}H_{17}NO_5Na)^+ = [M+Na]^+$ :  $m/z = 302.1004$ ; found:  $m/z = 302.1004$ ; calculated for  $(C_{15}H_{21}NO_6Na)^+ = [M+Na+CH_3OH]^+$ :  $m/z = 334.1266$ ; found:  $m/z = 334.1277$ .

## 2-(Hydroxy-(*m*-nitrophenyl)methyl)-5-methylcyclohexanone (5)

**$^1H$  NMR** (400 MHz,  $CDCl_3$ ):  $\delta$  = 8.17-8.13 (dt, 2H,  $J = 2.0$  Hz, ArH), 8.11-8.03 (ddd, 2H,  $J = 8.4, 2.4, 1.2$  Hz, ArH), 7.66-7.60 (m, 2H, ArH), 7.50-7.44 (m, 2H, ArH), 5.41 (*syn*; br s, 1H, CHCHOH), 4.87 (major *anti*; dd, 1H,  $J = 8.4, 2.4$  Hz, CHCHOH), 4.84 (minor *anti*; dd, 1H,  $J = 8.4, 2.8$  Hz, CHCHOH), 4.18 (minor *anti*; br d, 1H,  $J = 3.2$  Hz, CHCHOH), 4.07 (major *anti*; br d, 1H,  $J = 3.2$  Hz, CHCHOH), 3.41 (minor *syn*; br d, 1H,  $J = 3.6$  Hz, CHCHOH), 3.36 (major *syn*; br d, 1H,  $J = 3.2$  Hz, CHCHOH), 2.61-2.51 (*anti* and *syn*; m, 2H, CHCHOH), 2.43-2.36 (m, 2H, cyclohex-H), 2.22 (ddd, 1H,  $J = 13.2, 4.0, 1.6$  Hz, CHHCHHC(O)), 2.05 (m, 1H, cyclohex-H), 1.86-1.35 (series of m, 8H, cyclohex-H), 1.32-1.16 (series of m, 2H, cyclohex-H), 0.98 (d, 3H,  $J = 6.4$  Hz,  $CH_3$ ), 0.97 (d, 3H,  $J = 6.4$  Hz,  $CH_3$ ), 0.92 (major *anti*; d, 3H,  $J = 6.8$  Hz,  $CH_3$ ), 0.88 (d, 3H,  $J = 6.4$  Hz,  $CH_3$ ) ppm.

**$^{13}C$  NMR** (100 MHz,  $CDCl_3$ ):  $\delta$  = 214.5 (C(O)), 214.2 (C(O)), 214.1 (C(O)), 213.3 (C(O)), 148.0 (Ar C), 144.0 (Ar C), 143.9 (Ar C), 143.3 (major *anti*; Ar C), 143.2 (Ar C), 133.1 (Ar CH), 133.0 (major *anti*; Ar CH), 131.8 (major *anti*; Ar CH), 129.2 (Ar CH), 129.1 (Ar CH), 129.0 (Ar CH), 128.9 (Ar CH), 122.7 (major *anti*; Ar CH), 122.6 (Ar CH), 121.9 (Ar CH), 121.8 (Ar CH), 121.8 (Ar CH), 121.7 (major *anti*; Ar CH), 120.7 (Ar CH), 73.6 (minor *anti*; CHCHOH), 73.5 (major *anti*; CHCHOH), 69.8 (minor *syn*; CHCHOH), 69.5 (major *syn*; CHCHOH), 56.6 (major *anti*; CHCHOH), 56.1 (CHCHOH), 56.0 (CHCHOH), 55.7 (CHCHOH), 50.5 ( $CH_2$ ), 50.4 ( $CH_2$ ), 48.5 (major *anti*;  $CH_2$ ), 35.4 (CH), 35.3 (CH), 33.1 ( $CH_2$ ), 33.0 ( $CH_2$ ), 31.9 (major *anti*; CH), 31.8 (CH), 29.9 ( $CH_2$ ), 29.7 (major *anti*;  $CH_2$ ), 29.4 ( $CH_2$ ), 26.7 ( $CH_2$ ), 26.6 ( $CH_2$ ), 25.5 (major *anti*;  $CH_2$ ), 24.5 (major *anti*;  $CH_2$ ), 22.1 ( $CH_3$ ), 22.0 ( $CH_3$ ), 18.8 (major *anti*;  $CH_3$ ), 18.4 ( $CH_3$ ) ppm.

**HRMS** (ESI): calculated for  $(C_{14}H_{17}NO_4Na)^+ = [M+Na]^+$ :  $m/z = 286.1055$ ; found:  $m/z = 286.1054$ .

## 2-(Hydroxy-(*m*-nitrophenyl)methyl)-4-methylcyclohexanone (6)

**$^1H$  NMR** (400 MHz,  $CDCl_3$ ):  $\delta$  = 8.17-8.13 (dt, 2H,  $J = 2.0$  Hz, ArH), 8.11-8.03 (ddd, 2H,  $J = 8.4, 2.4, 1.2$  Hz, ArH), 7.65-7.58 (m, 2H, ArH), 7.51-7.44 (m, 2H, ArH), 5.41 (*syn*; br s, 1H, CHCHOH), 4.91 (major *anti* (2,4-*trans*); dd, 1H,  $J = 8.8, 2.0$  Hz, CHCHOH), 4.83 (minor *anti* (2,4-*cis*); dd, 1H,  $J = 8.0, 2.0$  Hz, CHCHOH), 4.20 (minor *anti*; br d, 1H,  $J = 2.8$  Hz, CHCHOH), 4.06 (major *anti*; br d, 1H,  $J = 3.6$  Hz, CHCHOH), 3.38 (minor *syn*; br d, 1H,  $J = 3.2$  Hz, CHCHOH), 3.34 (major *syn*; br d, 1H,  $J = 3.2$  Hz, CHCHOH), 2.80-2.64 (*anti* and *syn*; m, 2H, CHCHOH), 2.54-2.34 (m, 3H, cyclohex-H), 2.31 (m, 1H,

CHCH<sub>3</sub>), 2.10-1.66 (series of m, 4H, cyclohex-*H*), 1.58-1.48 (m, 2H, cyclohex-*H*), 1.45-1.26 (m, 4H, cyclohex-*H*), 1.21-1.04 (m, 1H, cyclohex-*H*), 1.00 (major *anti*; d, 3H, *J* = 6.8 Hz, CH<sub>3</sub>), 0.99 (minor *anti*; d, 3H, *J* = 7.2 Hz, CH<sub>3</sub>), 0.87 (major *syn*; d, 3H, *J* = 6.8 Hz, CH<sub>3</sub>), 0.85 (minor *syn*; d, 3H, *J* = 6.4 Hz, CH<sub>3</sub>) ppm.

**<sup>13</sup>C NMR** (100 MHz, CDCl<sub>3</sub>): δ= 215.0 (C(O)), 214.7 (major *anti*; C(O)), 214.1 (C(O)), 213.9 (C(O)), 148.1 (Ar C), 144.0 (Ar C), 143.9 (Ar C), 143.4 (major *anti*; Ar C), 143.1 (Ar C), 133.2 (Ar CH), 133.0 (major *anti*; Ar CH), 131.8 (Ar CH), 129.2 (major *anti*; Ar CH), 129.1 (Ar CH), 129.0 (Ar CH), 128.9 (Ar CH), 122.7 (major *anti*; Ar CH), 122.6 (Ar CH), 121.9 (Ar CH), 121.8 (Ar CH), 121.7 (major *anti*; Ar CH), 120.7 (Ar CH), 120.6 (Ar CH), 73.8 (major *anti*; CHCHOH), 73.7 (minor *anti*; CHCHOH), 70.1 (minor *syn*; CHCHOH), 69.4 (major *syn*; CHCHOH), 55.8 (CHCHOH), 55.5 (CHCHOH), 53.0 (major *anti*; CHCHOH), 52.1 (CHCHOH), 41.7 (CH<sub>2</sub>), 41.5 (CH<sub>2</sub>), 38.3 (CH<sub>2</sub>), 38.1 (CH<sub>2</sub>), 38.0 (major *anti*; CH<sub>2</sub>), 36.0 (major *anti*; CH<sub>2</sub>), 35.4 (CH<sub>2</sub>), 35.3 (CH<sub>2</sub>), 33.4 (CH<sub>2</sub>), 33.0 (major *anti*; CH<sub>2</sub>), 32.7 (CH<sub>2</sub>), 31.3 (CH), 31.2 (CH), 26.7 (CH<sub>2</sub>), 26.5 (major *anti*; CH), 26.4 (CH<sub>2</sub>), 21.1 (CH<sub>3</sub>), 20.9 (CH<sub>3</sub>), 18.3 (major *anti*; CH<sub>3</sub>), 18.1 (CH<sub>3</sub>) ppm.

**HRMS** (ESI): calculated for (C<sub>14</sub>H<sub>17</sub>NO<sub>4</sub>Na)<sup>+</sup> = [M+Na]<sup>+</sup>: *m/z* = 286.1055; found: *m/z* = 286.1053.

## 2-(Hydroxy-(*m*-nitrophenyl)methyl)-6,6-dimethyl-(*S*)-5-hydroxycyclohexanone (7)

**<sup>1</sup>H NMR** (400 MHz, CDCl<sub>3</sub>): δ= 8.22-8.08 (series of m, 8H, ArH), 7.69-7.64 (series of br m, 4H, ArH), 7.51 (ddd, 4H, *J* = 10.8, 4.8, 2.8 Hz, ArH), 5.45 (*syn*; br s, 1H, CHCHOH), 5.41 (*syn*; br s, 1H, CHCHOH), 4.89 (minor *anti*; dd, 1H, *J* = 8.4, 2.4 Hz, CHCHOH), 4.82 (major *anti*; dd, 1H, *J* = 8.4, 2.8 Hz, CHCHOH), 4.20 (minor *anti*; br d, 1H, *J* = 2.8 Hz, CHCHOH), 4.04 (major *anti*; br d, 1H, *J* = 3.2 Hz, CHCHOH), 3.89 (br s, 2H, CH(OH)cyclohex), 3.51 (dd, 2H, *J* = 11.2, 4.4 Hz, CH(OH)cyclohex), 3.24 (*syn*; br s, 1H, CHCHOH), 3.16 (*syn*; d, 1H, *J* = 3.2 Hz, CHCHOH), 2.86 (*anti* and *syn*; ddd, 3H, *J* = 8.4, 6.0, 2.4 Hz, CHCHOH), 2.20 (*anti/syn*; dd, 1H, *J* = 13.6, 4.4 Hz, CHCHOH), 2.13-2.04 (m, 3H, cyclohex-*H*), 1.96 (m, 5H, cyclohex-*H*), 1.82-1.45 (series of m, 9H, cyclohex-*H*), 1.40 (m, 1H, cyclohex-*H*), 1.26 (s, 3H, CH<sub>3</sub>), 1.25 and 1.24 (br s, 6H, CH<sub>3</sub>), 1.22 (s, 3H, CH<sub>3</sub>), 1.17 and 1.16 (br s, 12H, CH<sub>3</sub>) ppm.

**<sup>13</sup>C NMR** (100 MHz, CDCl<sub>3</sub>): δ= 217.8 (C(O)), 216.9 (C(O)), 216.4 (C(O)), 215.7 (C(O)), 167.8 (C), 148.3 (Ar C), 144.0 (Ar C), 143.8 (Ar C), 143.3 (Ar C), 143.1 (Ar C), 133.3 (Ar CH), 133.1 (Ar CH), 132.4 (C), 132.1 (Ar CH), 131.9 (Ar CH), 130.9 (Ar CH), 129.4 (Ar CH), 129.2 (2 Ar CH), 129.1 (Ar CH), 128.8 (Ar CH), 122.9 (Ar CH), 122.8 (Ar CH), 122.2 (Ar CH), 122.1 (Ar CH), 122.0 (Ar CH), 121.9 (Ar CH), 120.9 (Ar CH), 120.8 (Ar CH), 79.1 (CH(OH)cyclohex), 78.7 (CH(OH)cyclohex), 76.8 (CH(OH)cyclohex), 76.6 (CH(OH)cyclohex), 74.0 (*anti*; CHCHOH), 73.8 (*anti*; CHCHOH), 70.1 (*syn*; CHCHOH), 69.9 (*syn*; CHCHOH), 52.1 (CHCHOH), 51.7 (CHCHOH), 51.6 (CHCHOH), 51.2 (CHCHOH), 43.7 (C),

43.6 (C), 43.4 (C), 43.3 (C), 30.3 (CH<sub>2</sub>), 30.1 (CH<sub>2</sub>), 27.5 (CH<sub>2</sub>), 27.4 (CH<sub>2</sub>), 26.8 (CH<sub>2</sub>), 23.7 (CH<sub>2</sub>), 22.9 (CH<sub>2</sub>), 21.0 (CH<sub>3</sub>), 20.9 (CH<sub>3</sub>), 20.6 (CH<sub>3</sub>), 20.5 (CH<sub>3</sub>), 18.8 (CH<sub>2</sub>), 18.6 (CH<sub>3</sub>), 18.5 (CH<sub>3</sub>), 14.0 (CH<sub>3</sub>), 10.9 (CH<sub>3</sub>) ppm.

**HRMS** (ESI): calculated for (C<sub>15</sub>H<sub>19</sub>NO<sub>5</sub>Na)<sup>+</sup> = [M+Na]<sup>+</sup>: *m/z* = 316.1160; found: *m/z* = 316.1160; calculated for (C<sub>15</sub>H<sub>19</sub>NO<sub>5</sub>K)<sup>+</sup> = [M+Na]<sup>+</sup>: *m/z* = 332.0900; found: *m/z* = 332.0912.

**References:**

- [P1] a) K. Sakthivel, W. Notz, T. Bui, C. F. Barbas III, *J. Am. Chem. Soc.* **2001**, 123, 5260-5267; b) N. Mase, Y. Nakai, N. Ohara, H. Yoda, K. Takabe, F. Tanaka, C. F. Barbas III, *J. Am. Chem. Soc.* **2006**, 128, 734-735; c) B. Rodríguez, T. Rantanen, C. Bolm, *Angew. Chem.* **2006**, 118, 7078–7080; *Angew. Chem. Int. Ed.* **2006**, 45, 6924–6926; d) B. Rodríguez, A. Bruckmann, C. Bolm, *Chem. Eur. J.* **2007**, 13, 4710-4722.
- [P2] a) J. Jiang, L. He, S.-F. Cun, L.-Z. Gong, *Chem. Commun.* **2007**, 736-738; b) X. Companyó, G. Valero, L. Crovetto, A. Moyano, R. Rios, *Chem. Eur. J.* **2009**, 15, 6564-6568.
- [P3] a) P. Duhamel, D. Cahard, Y. Quesnel, J.-M. Poirier, *J. Org. Chem.* **1996**, 61, 2232-2235; b) D. E. Ward, M. Sales, P. K. Sasmal, *J. Org. Chem.* **2004**, 69, 4808-4815; c) B. Schetter, B. Ziemer, G. Schnakenburg, R. Mahrwald, *J. Org. Chem.* **2008**, 73, 813-819.

NMR Spectra

Compound 3

*Ethanolamine as catalyst in water*

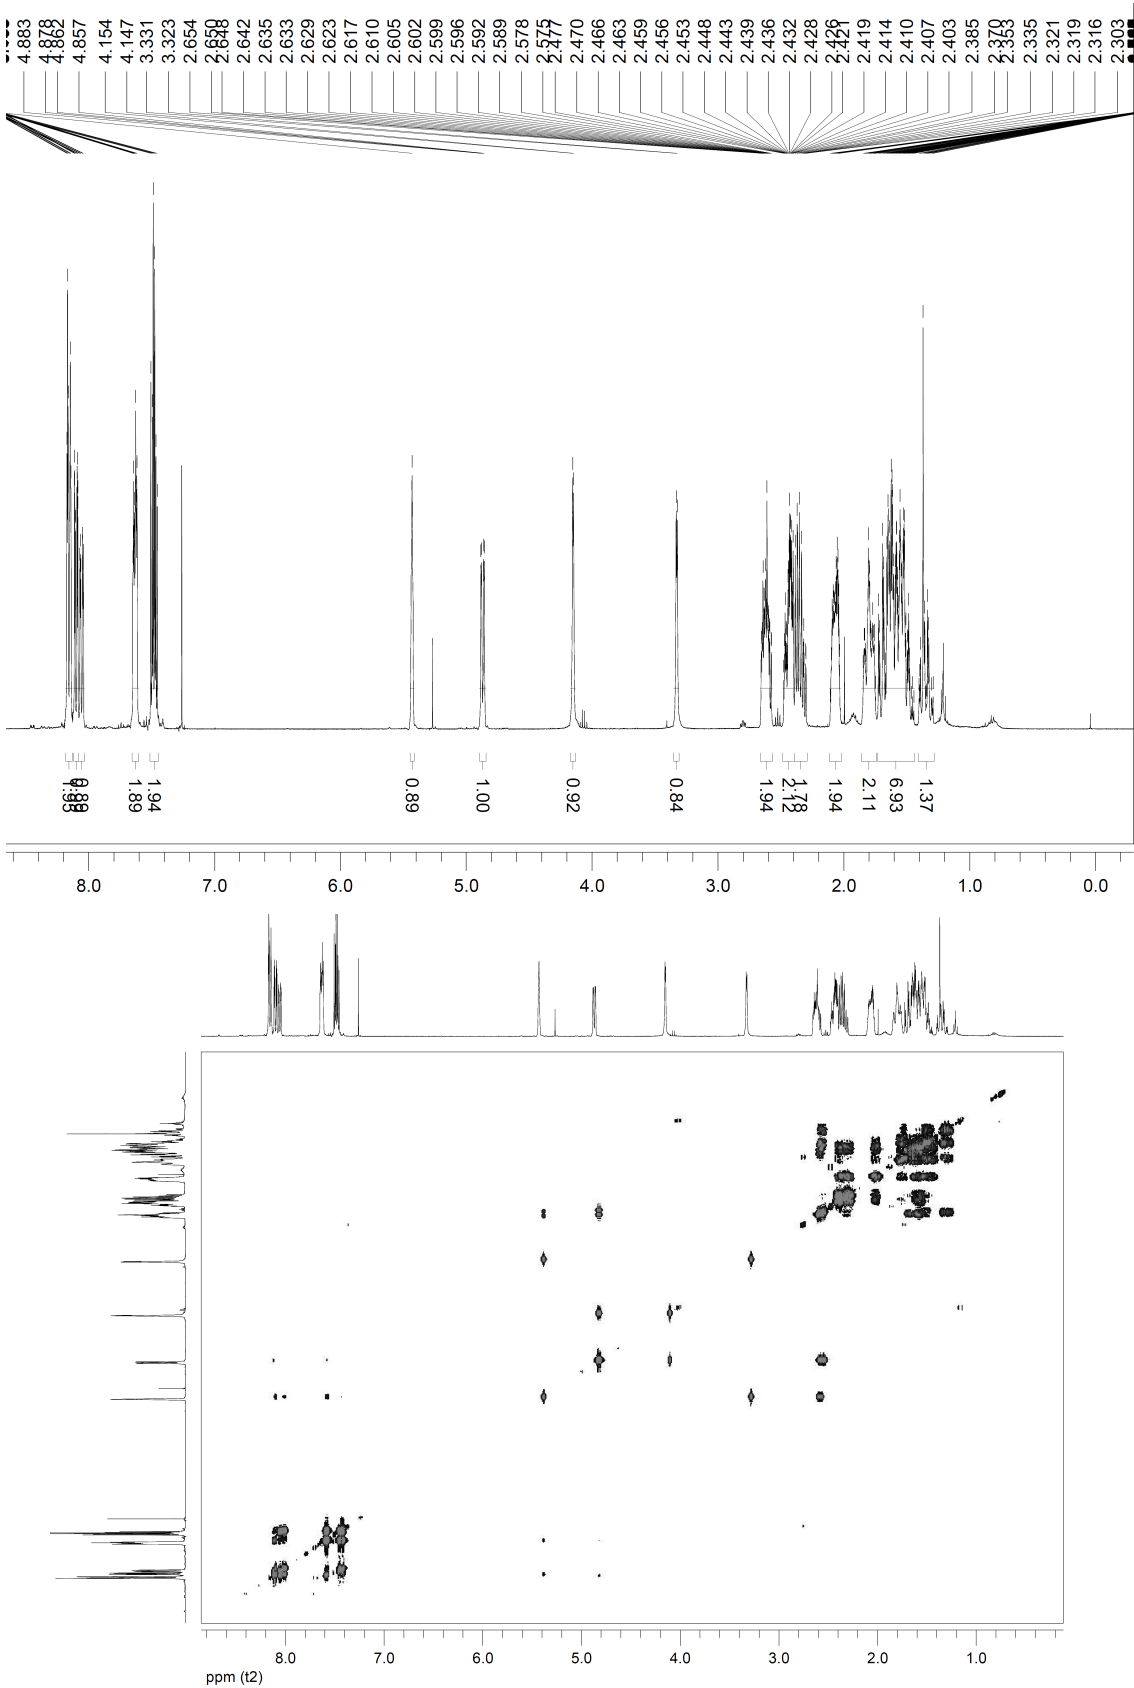

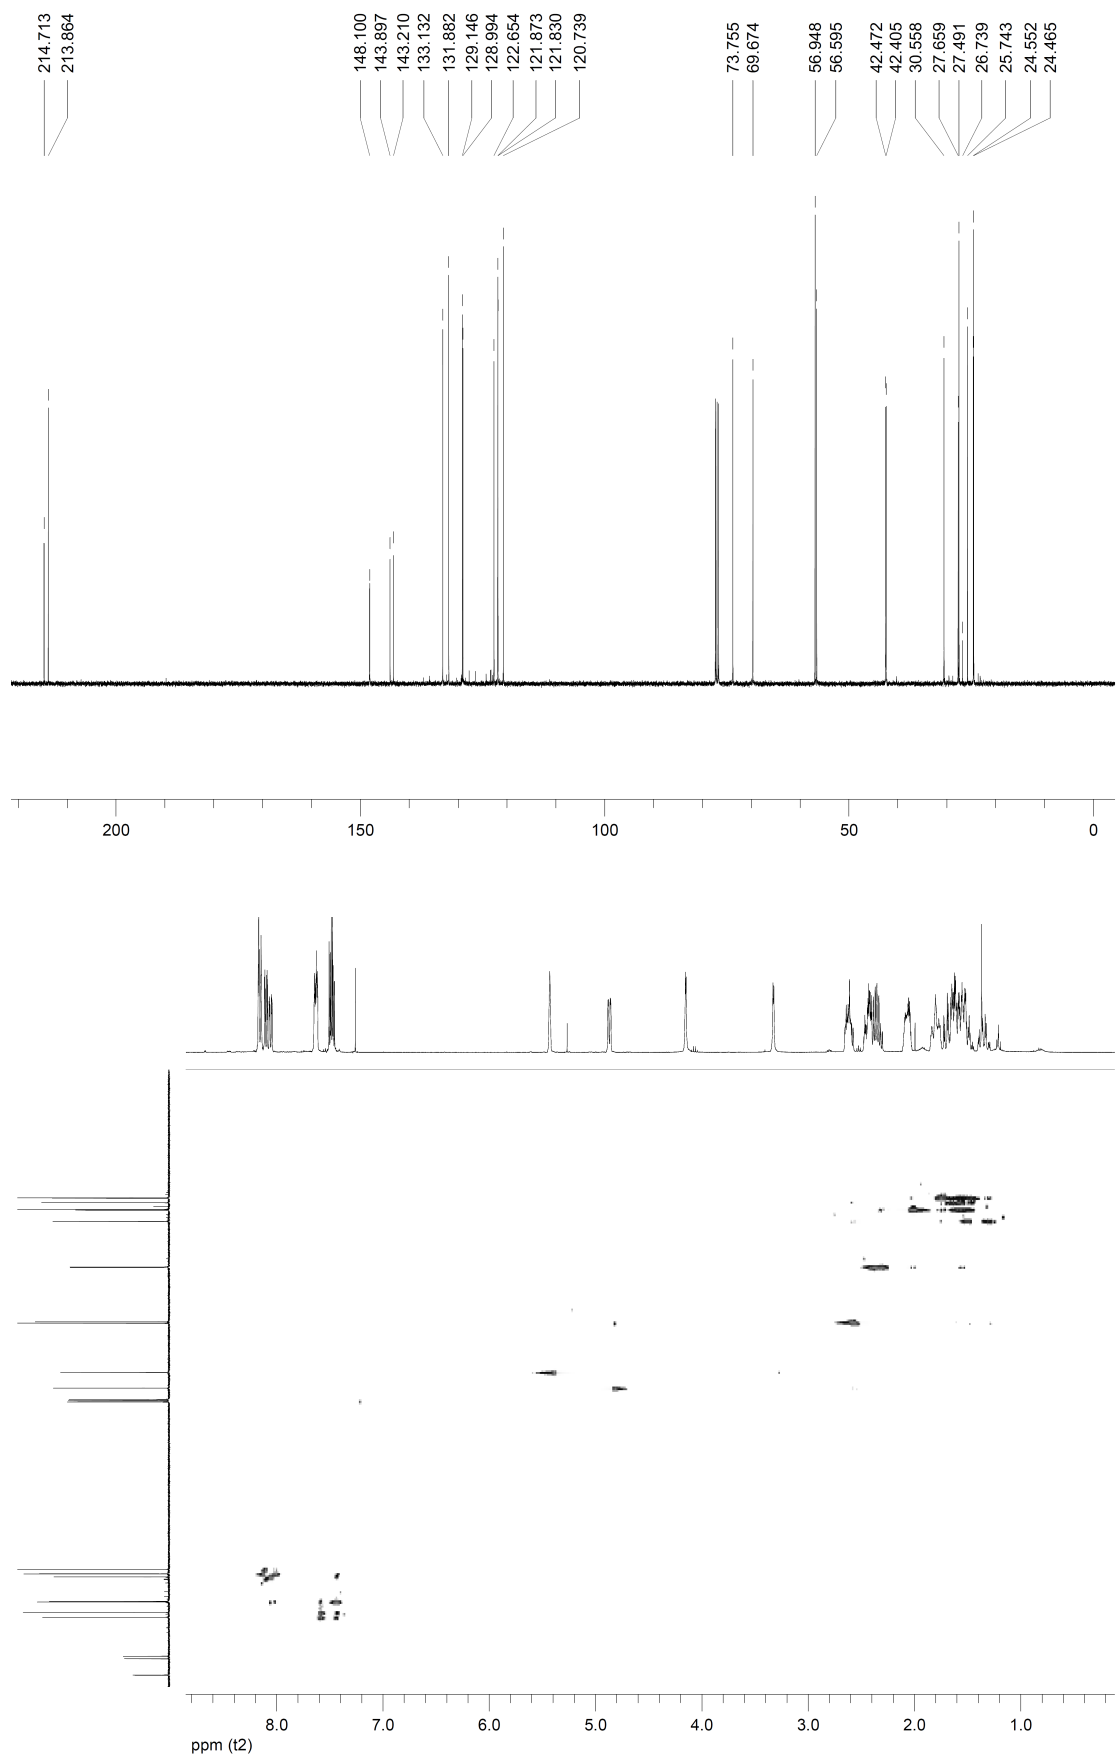

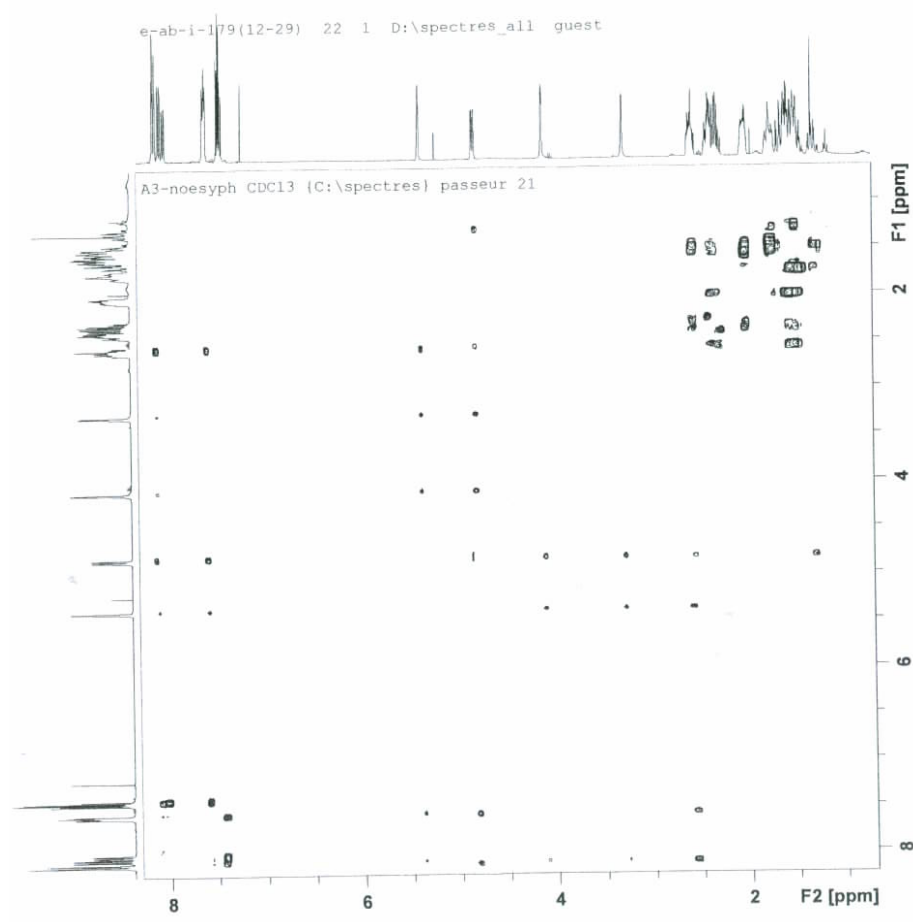

**Ethanolamine as catalyst with ethyl sugar 2b**

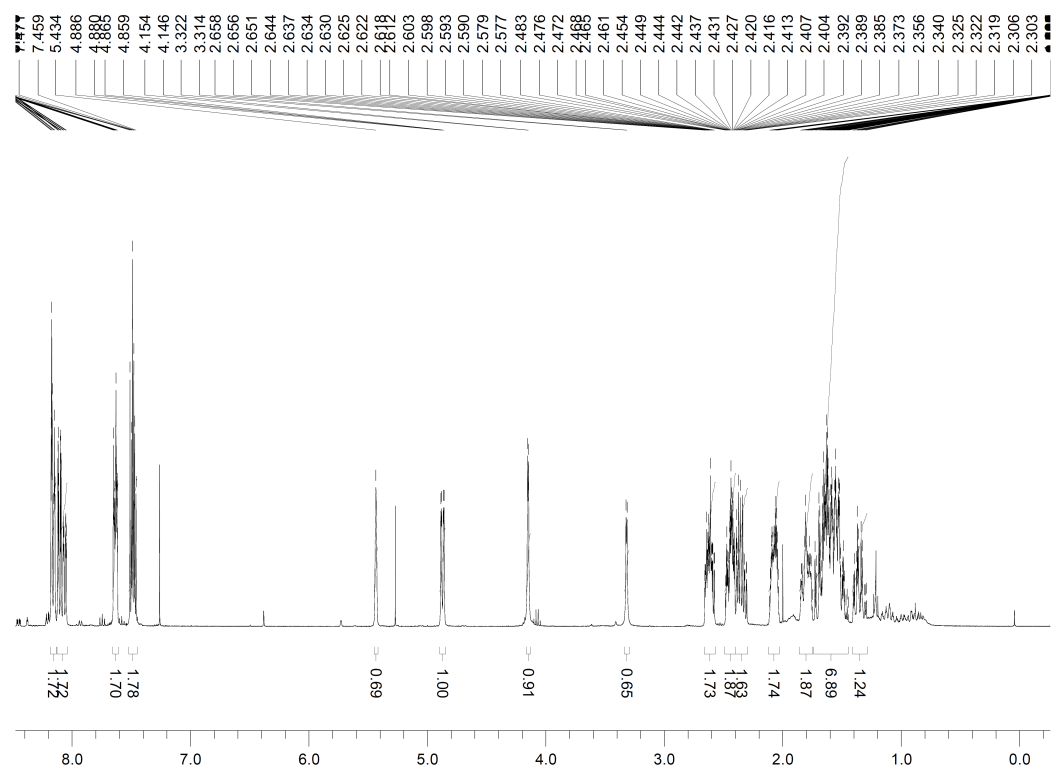



***(R)*-3-pyrrolidinol as catalyst in water**

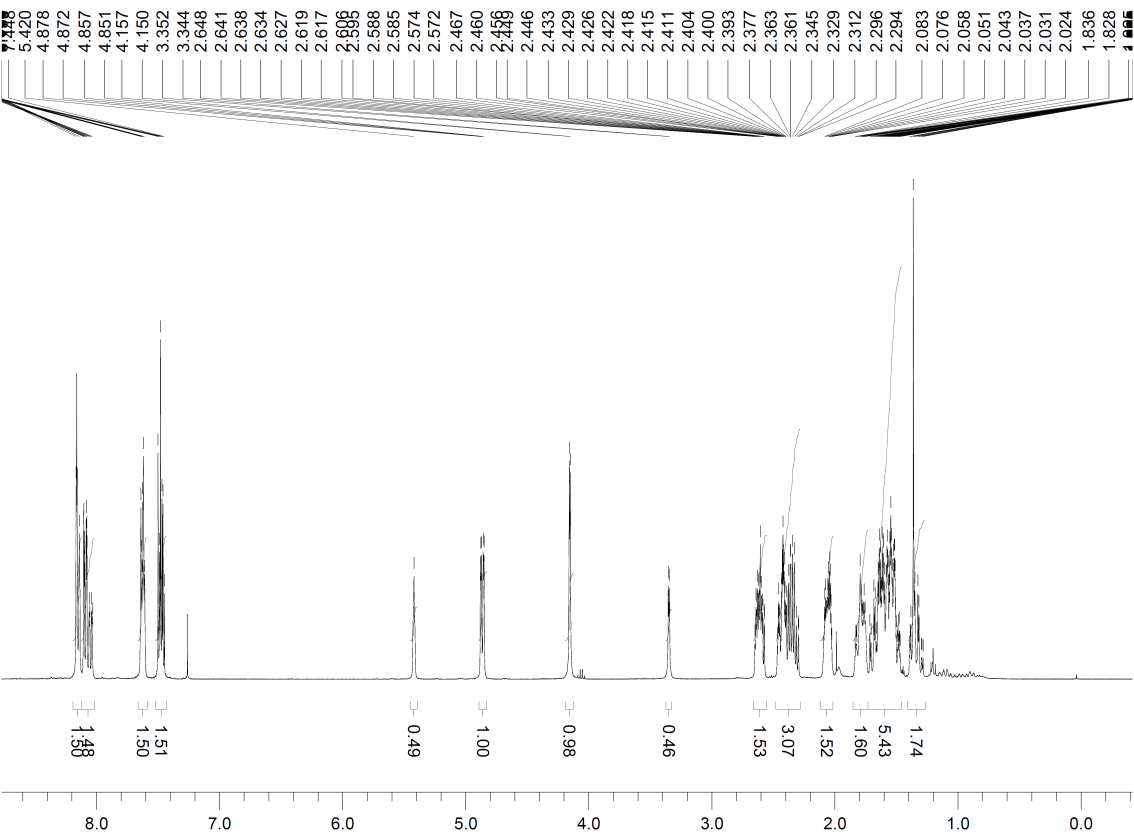

***(R)*-3-pyrrolidinol as catalyst with ethyl sugar 2b**

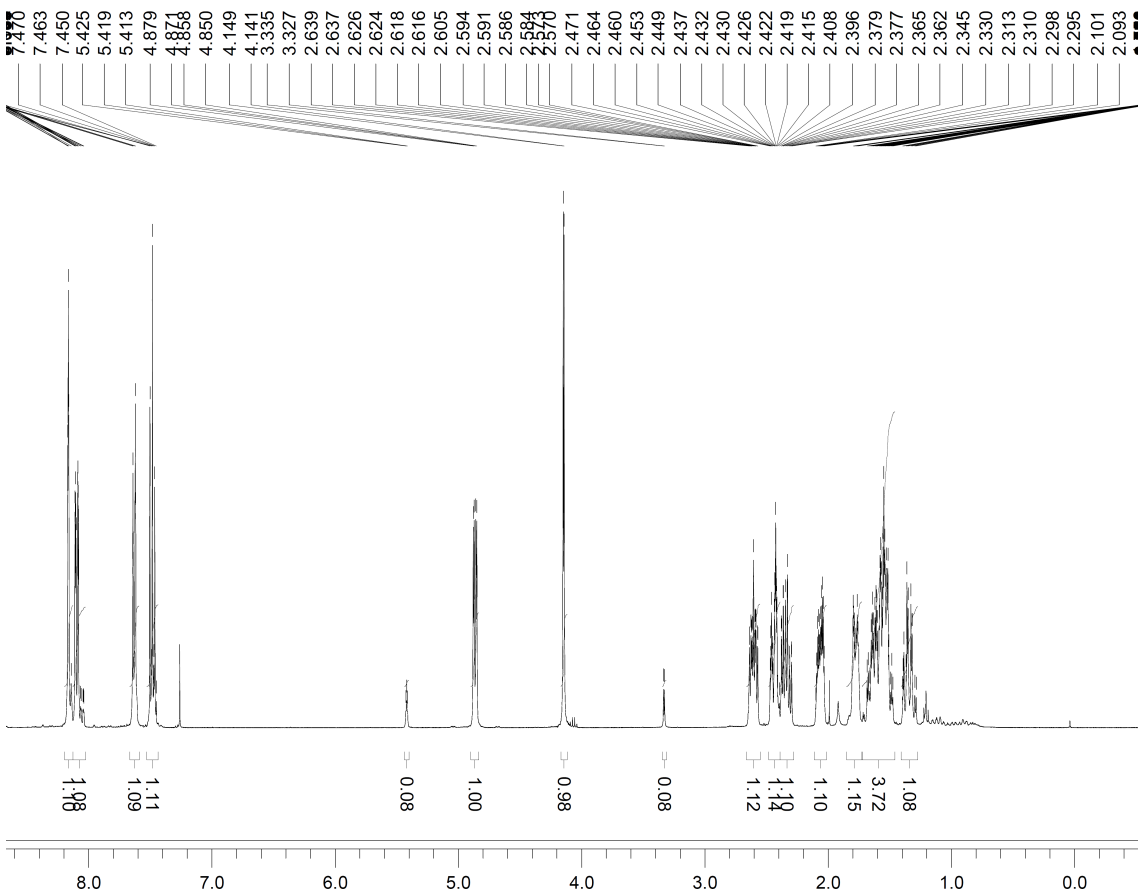

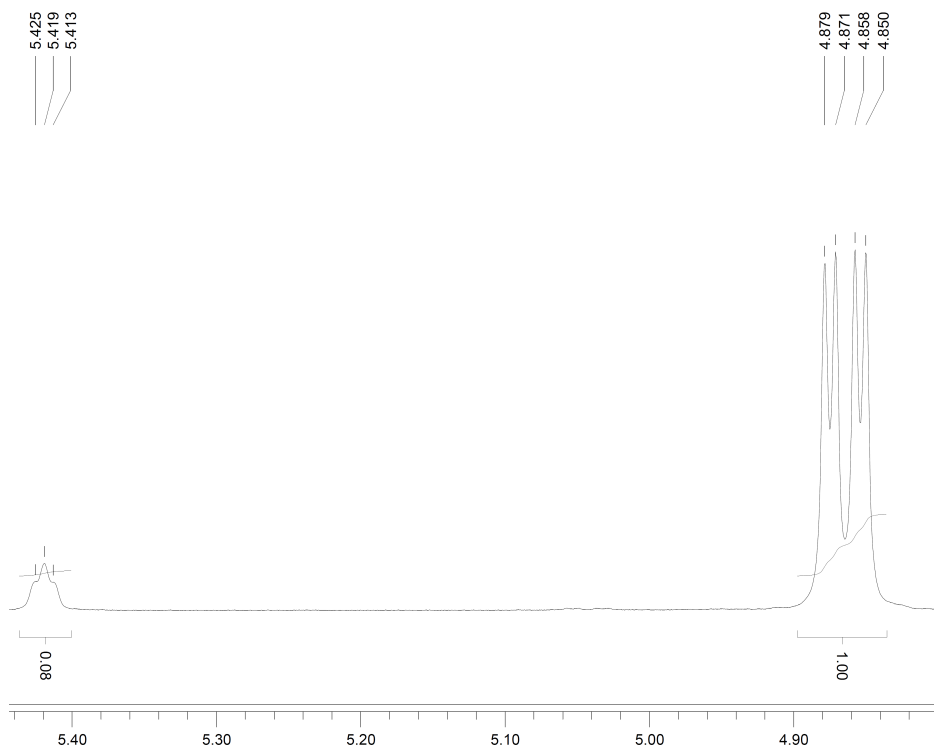

***(R)*-3-pyrrolidinol as catalyst with sucrose as sugar derivative**

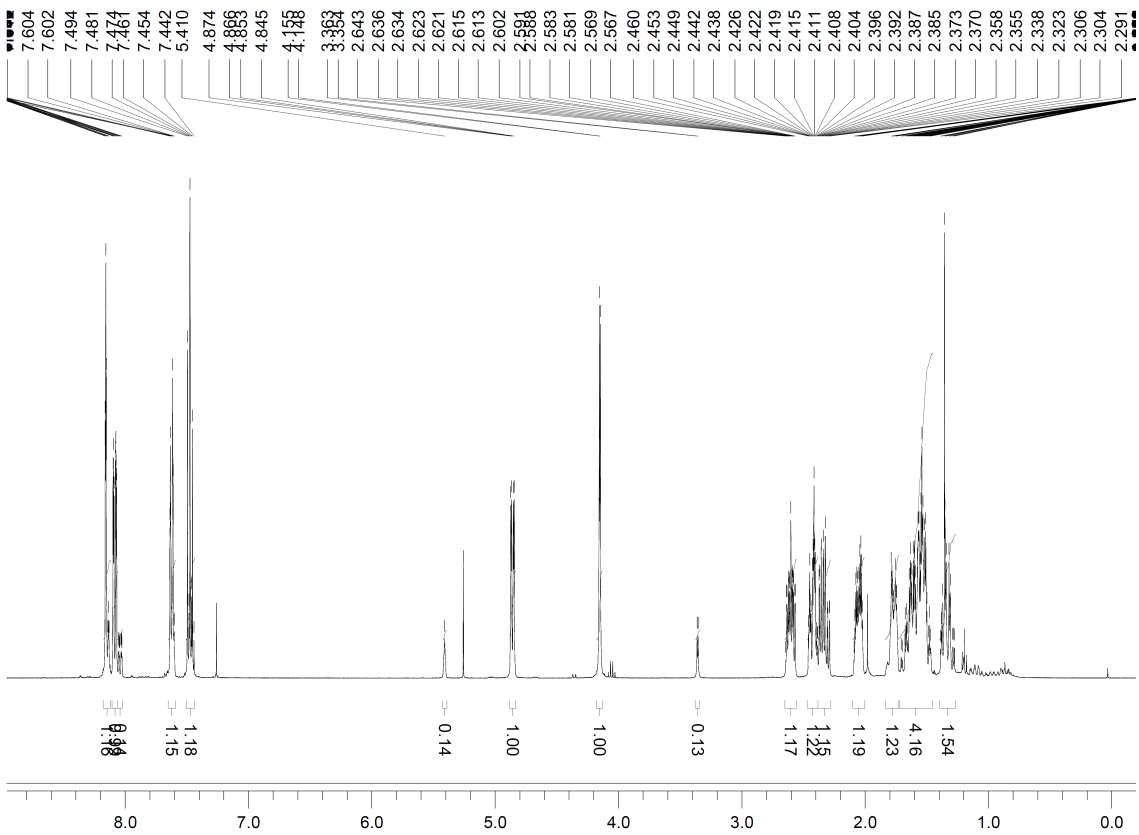

*rac*-pyrrolidinol as catalyst in water

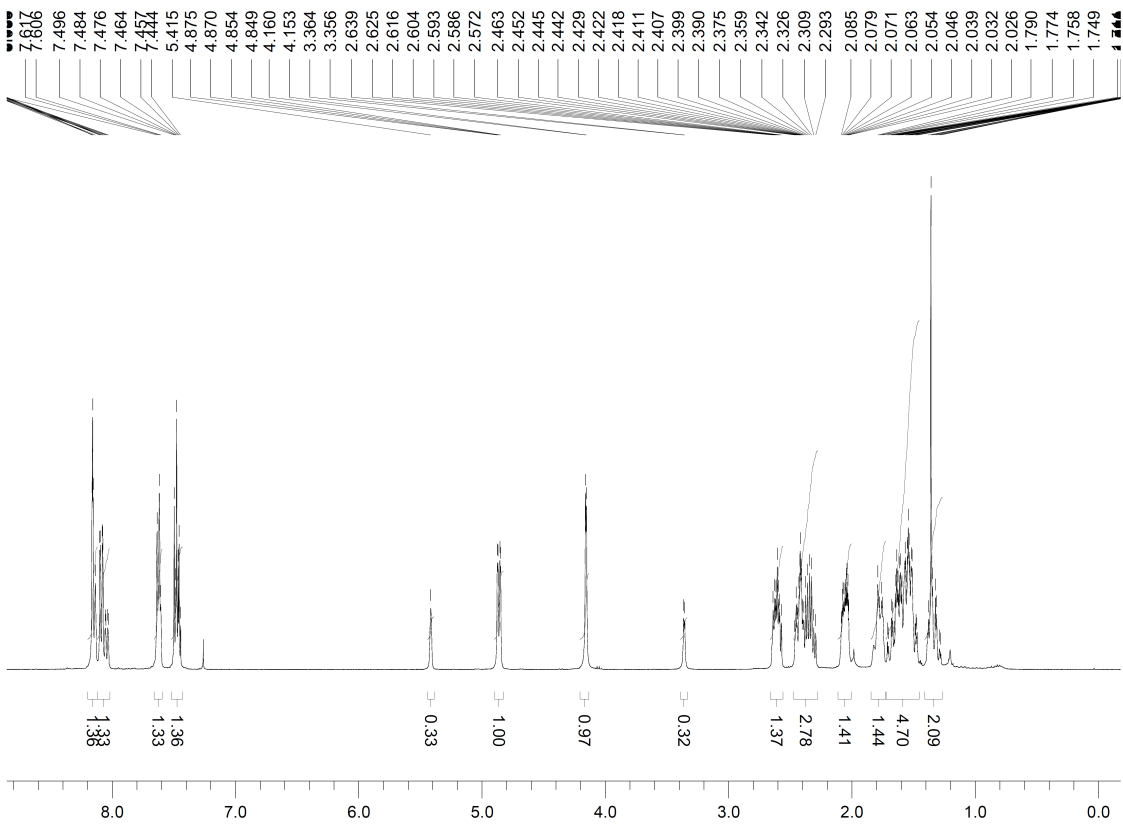

*rac*-pyrrolidinol as catalyst with ethyl sugar 2b

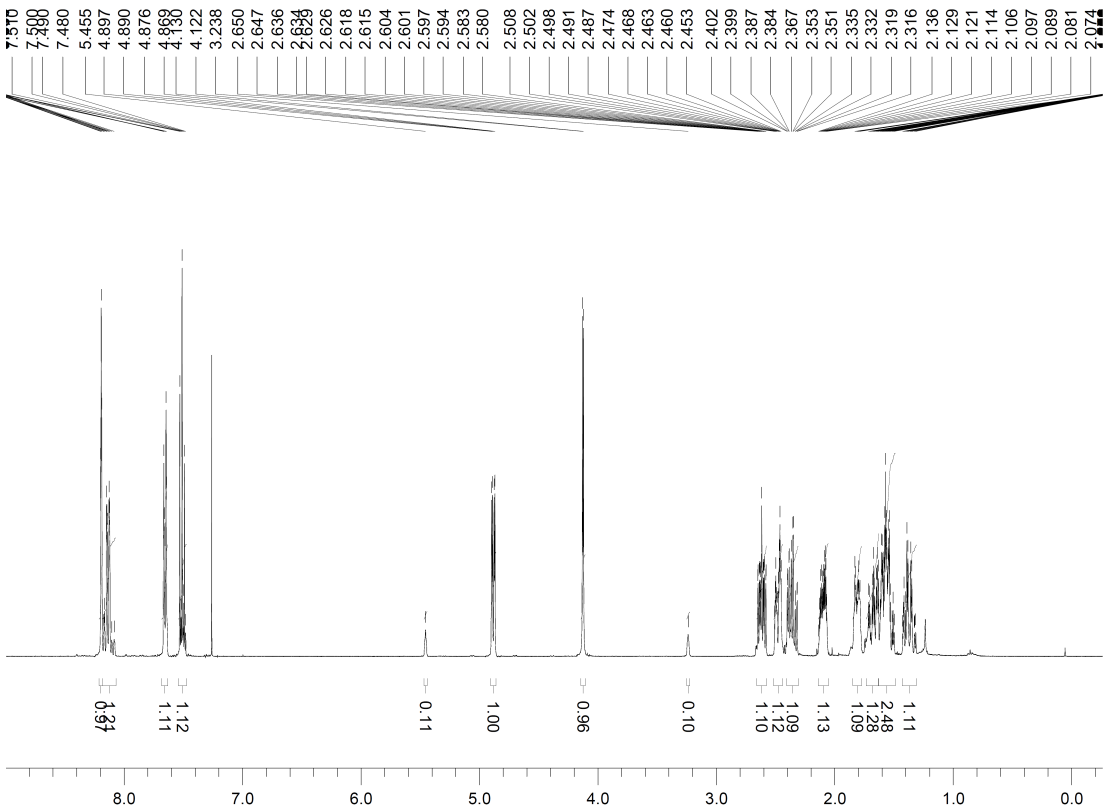

***Pyrrolidine as catalyst in water***

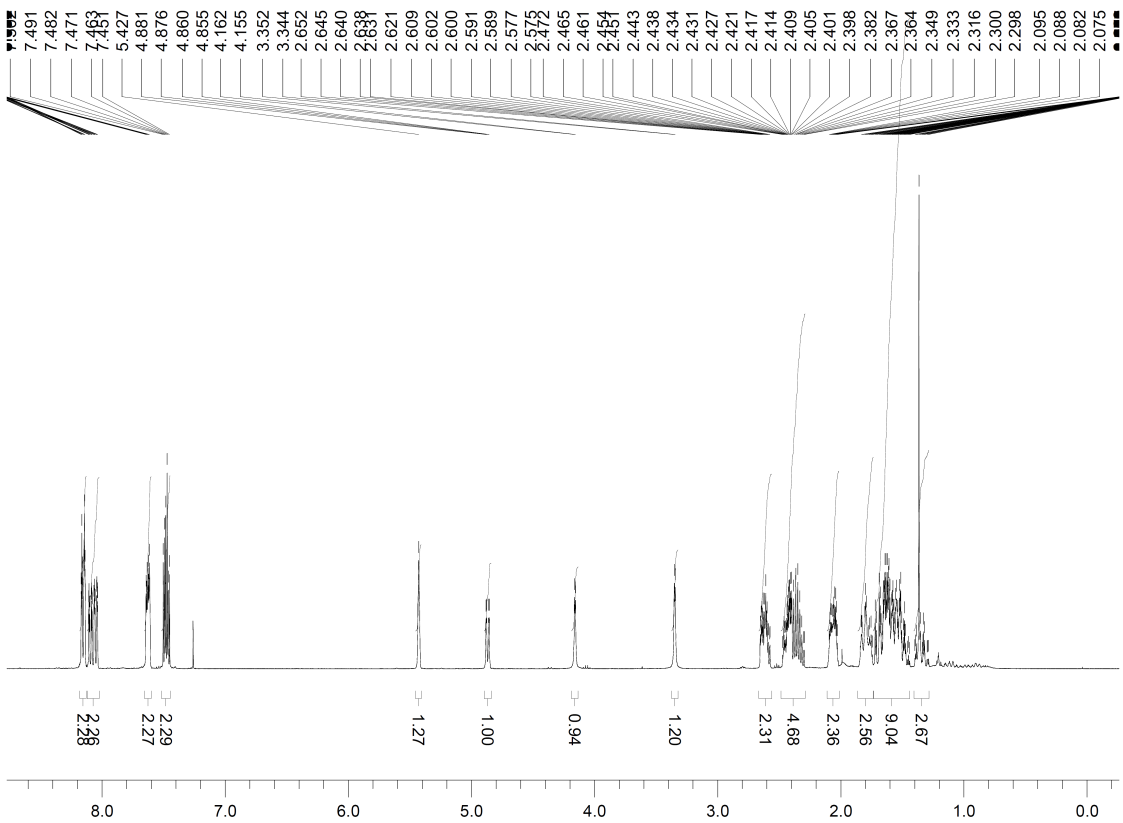

***Pyrrolidine as catalyst with ethyl sugar 2b***

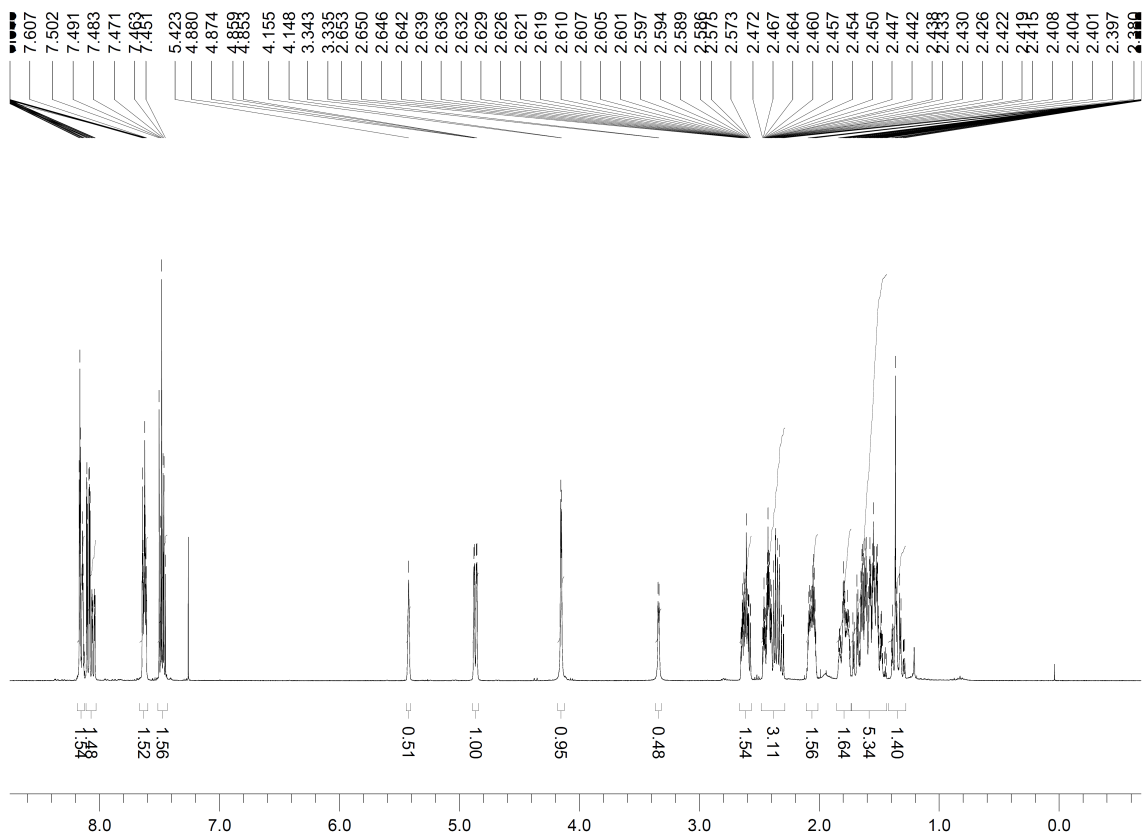

***(R)-3-pyrrolidinol as catalyst with ethyl sugar 2b (1.5 equiv. aldehyde)***

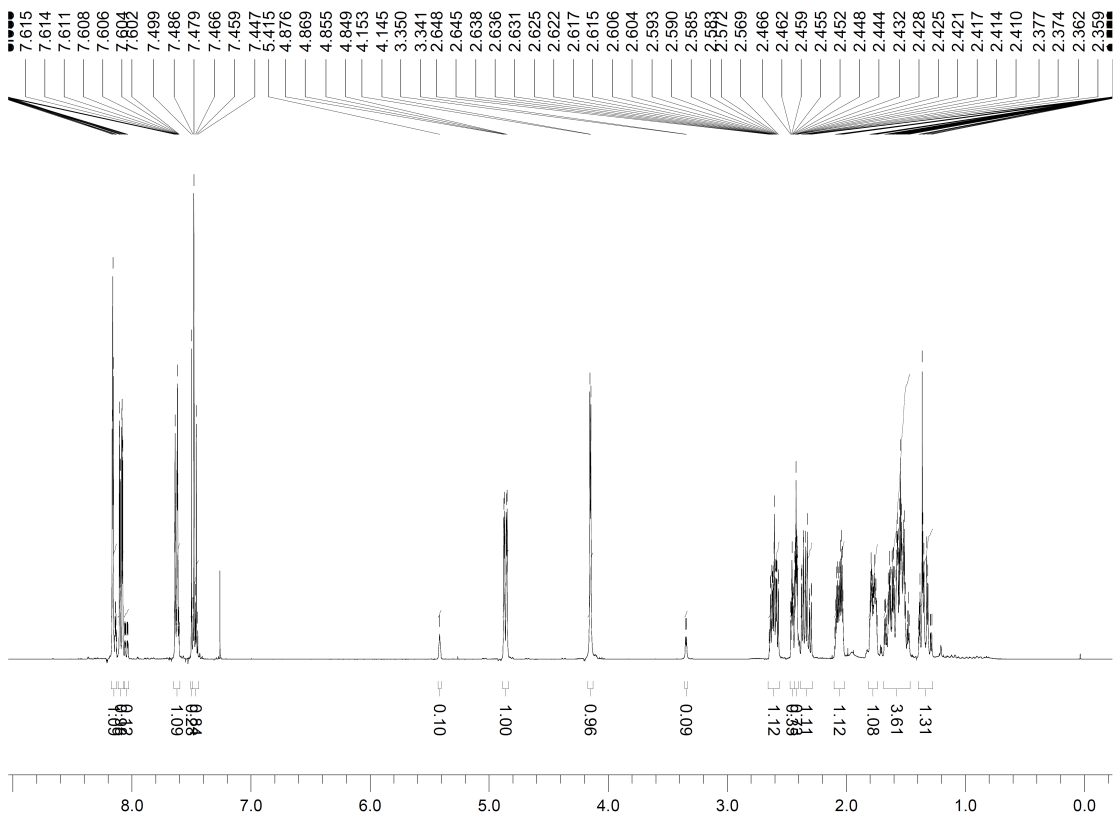

***L-prolinol as catalyst in water***

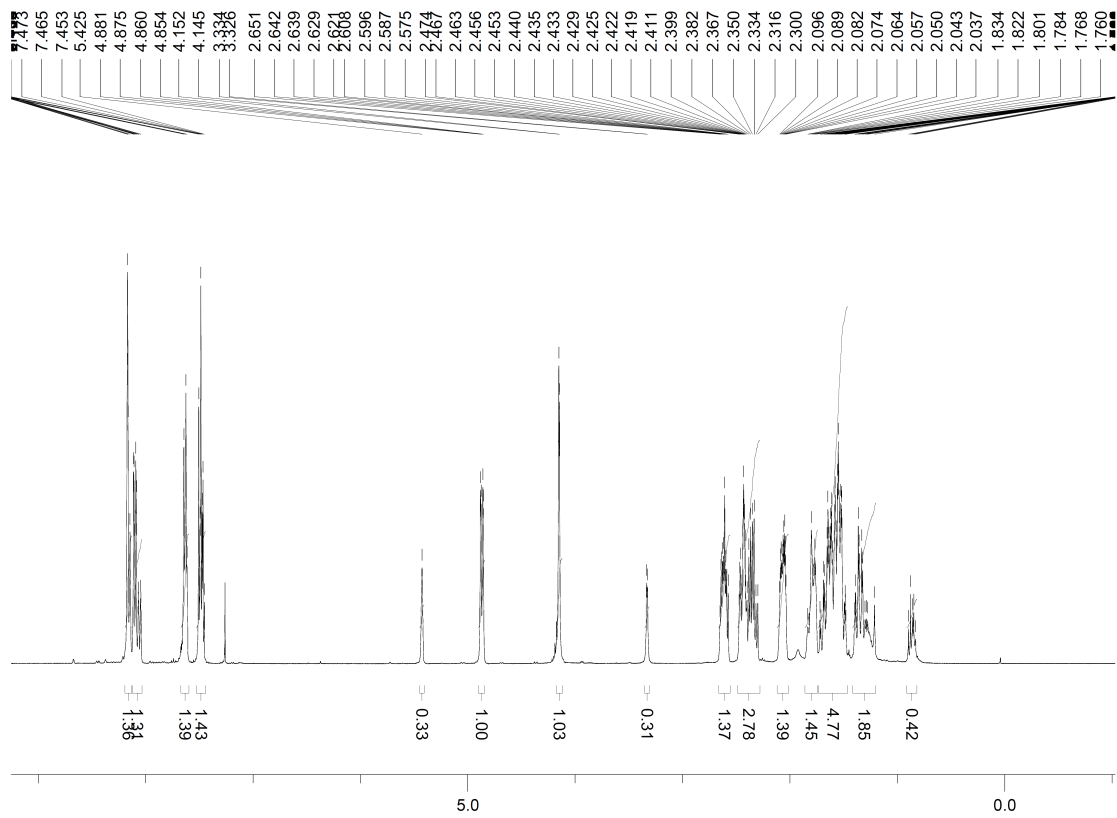

***L*-prolinol as catalyst with ethyl sugar 2b**

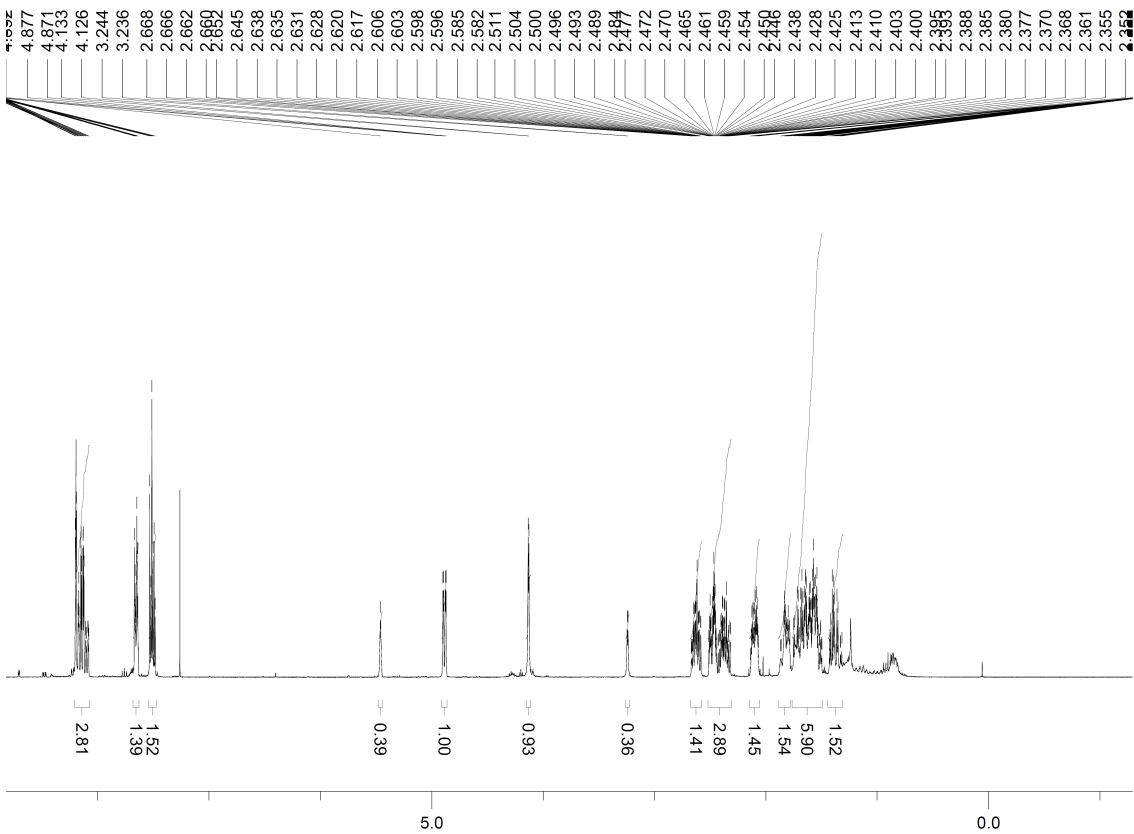

Compound 4

*(R)*-3-pyrrolidinol as catalyst in water

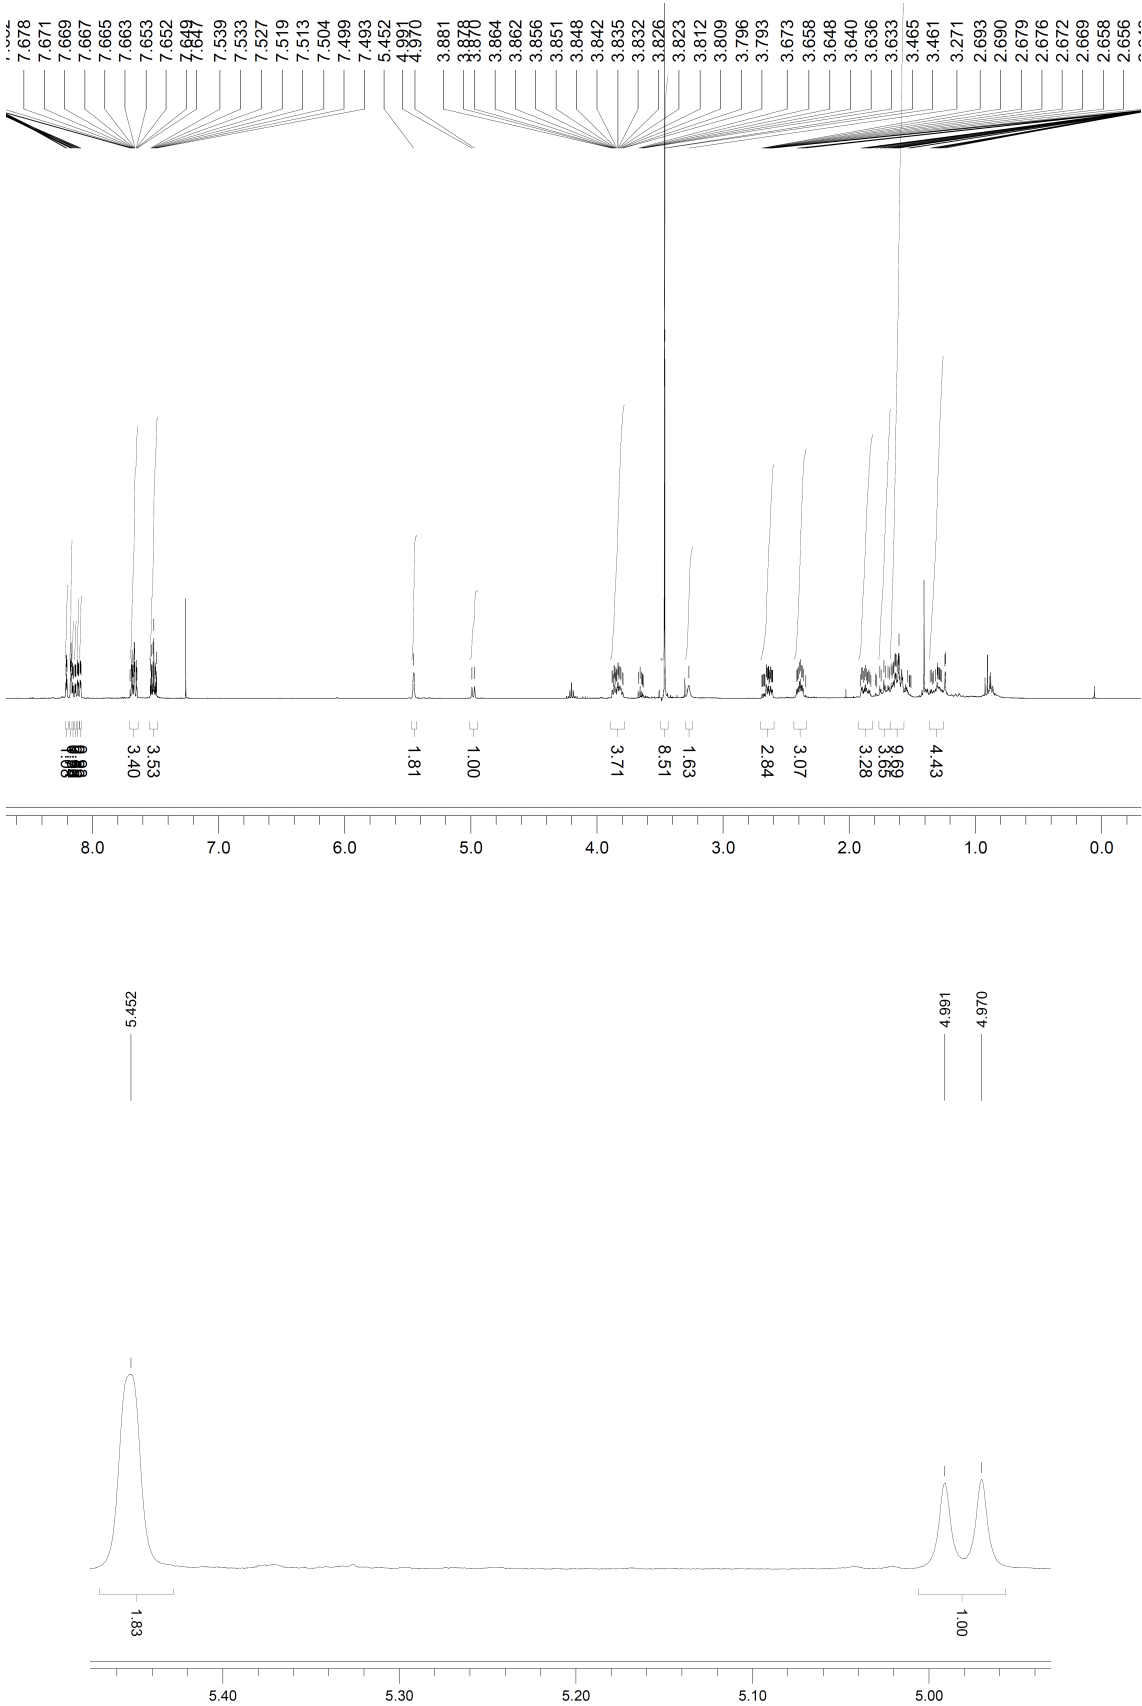

**(R)-3-pyrrolidinol as catalyst with ethyl sugar 2b**

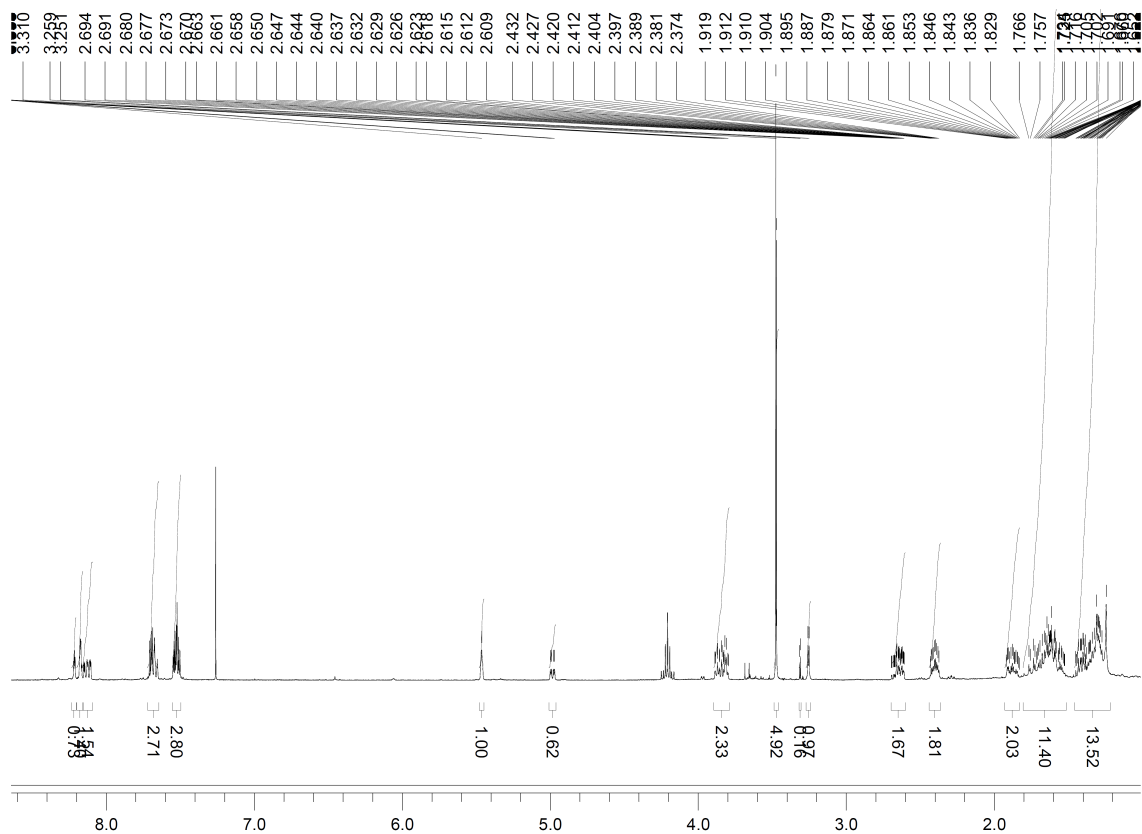



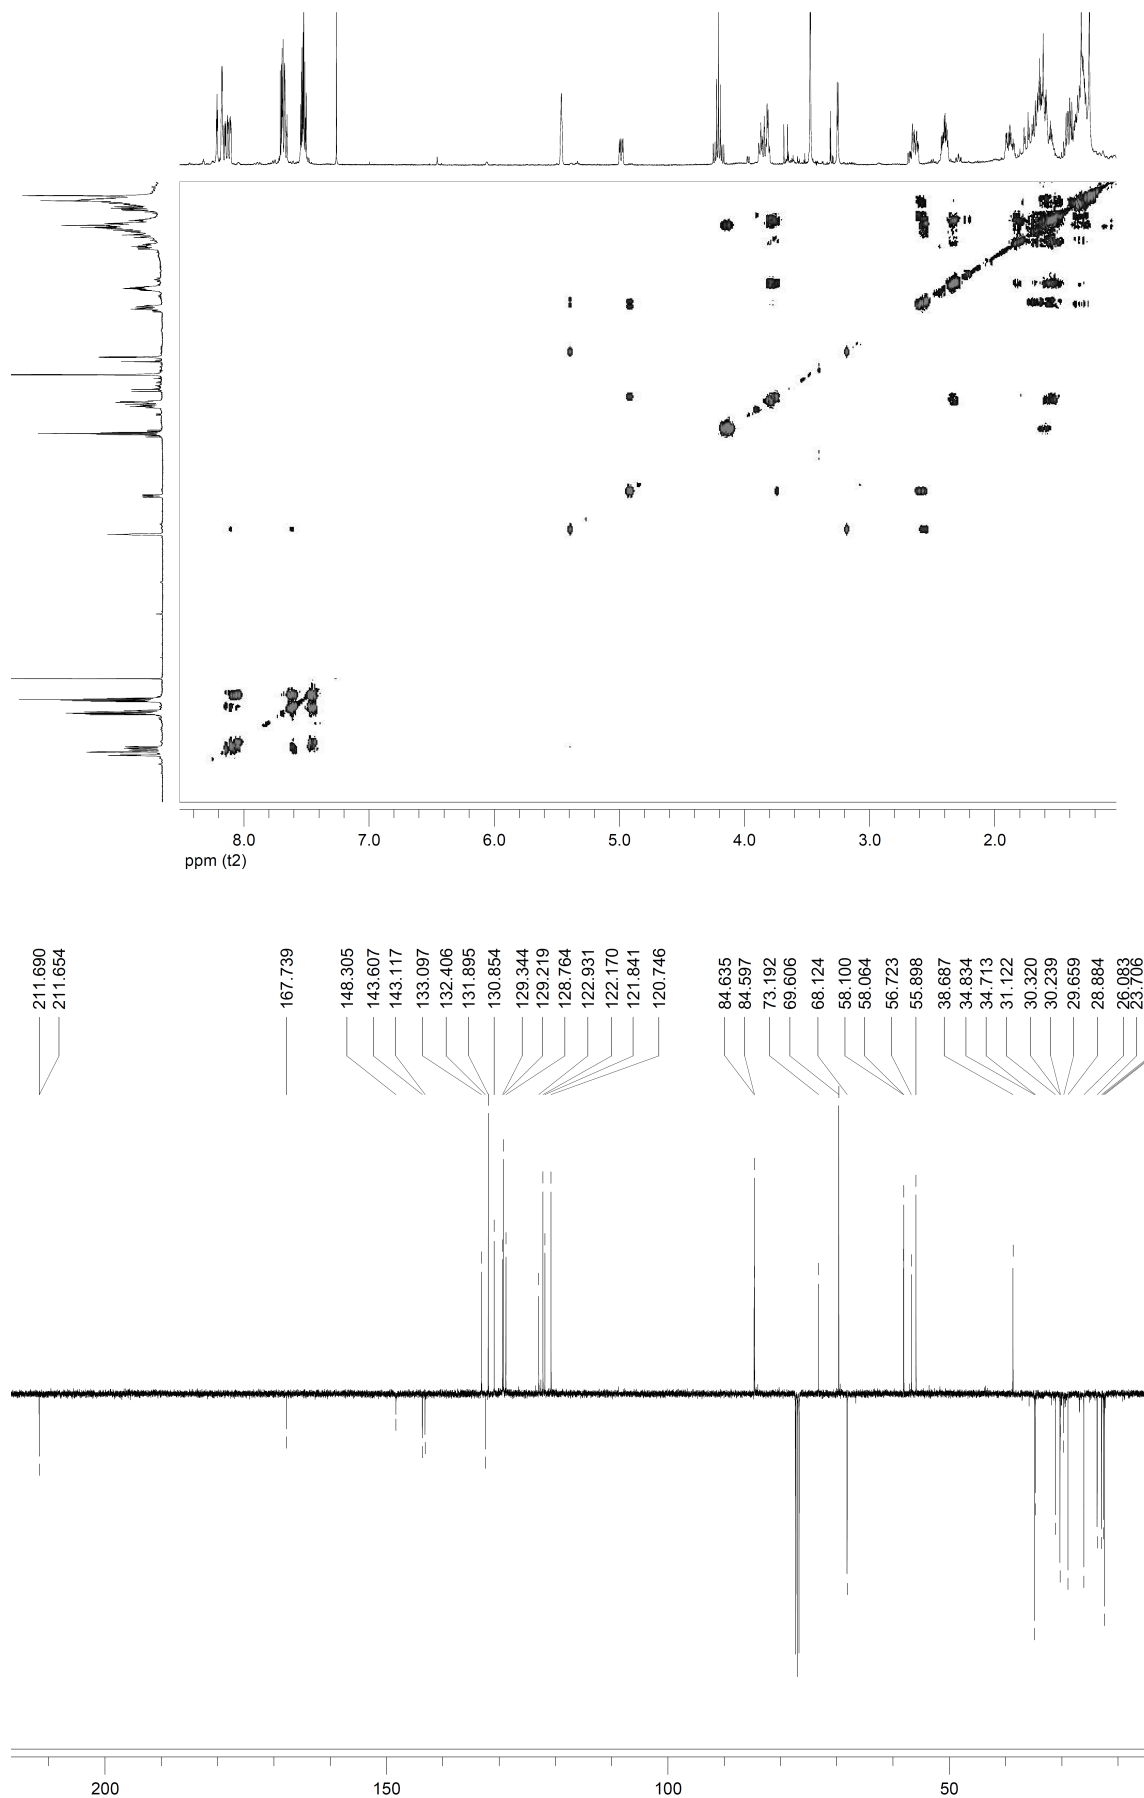

Compound 5

(R)-3-pyrrolidinol as catalyst in water

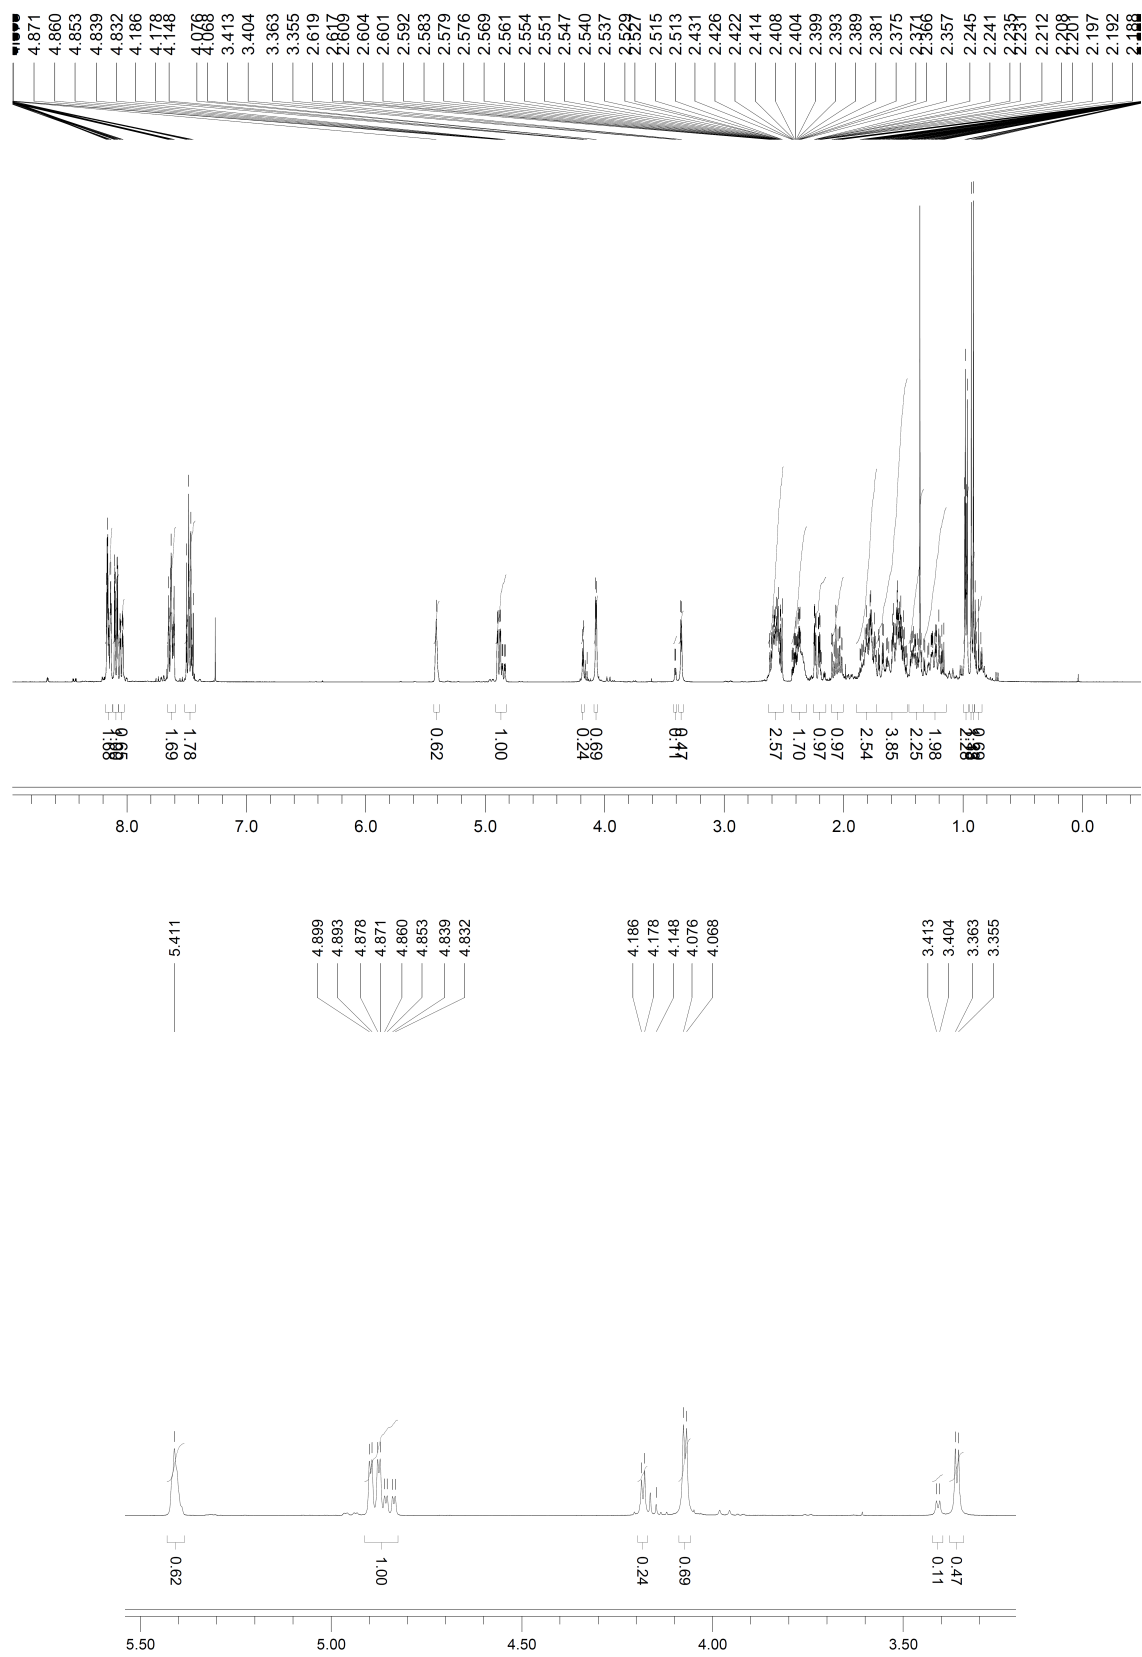

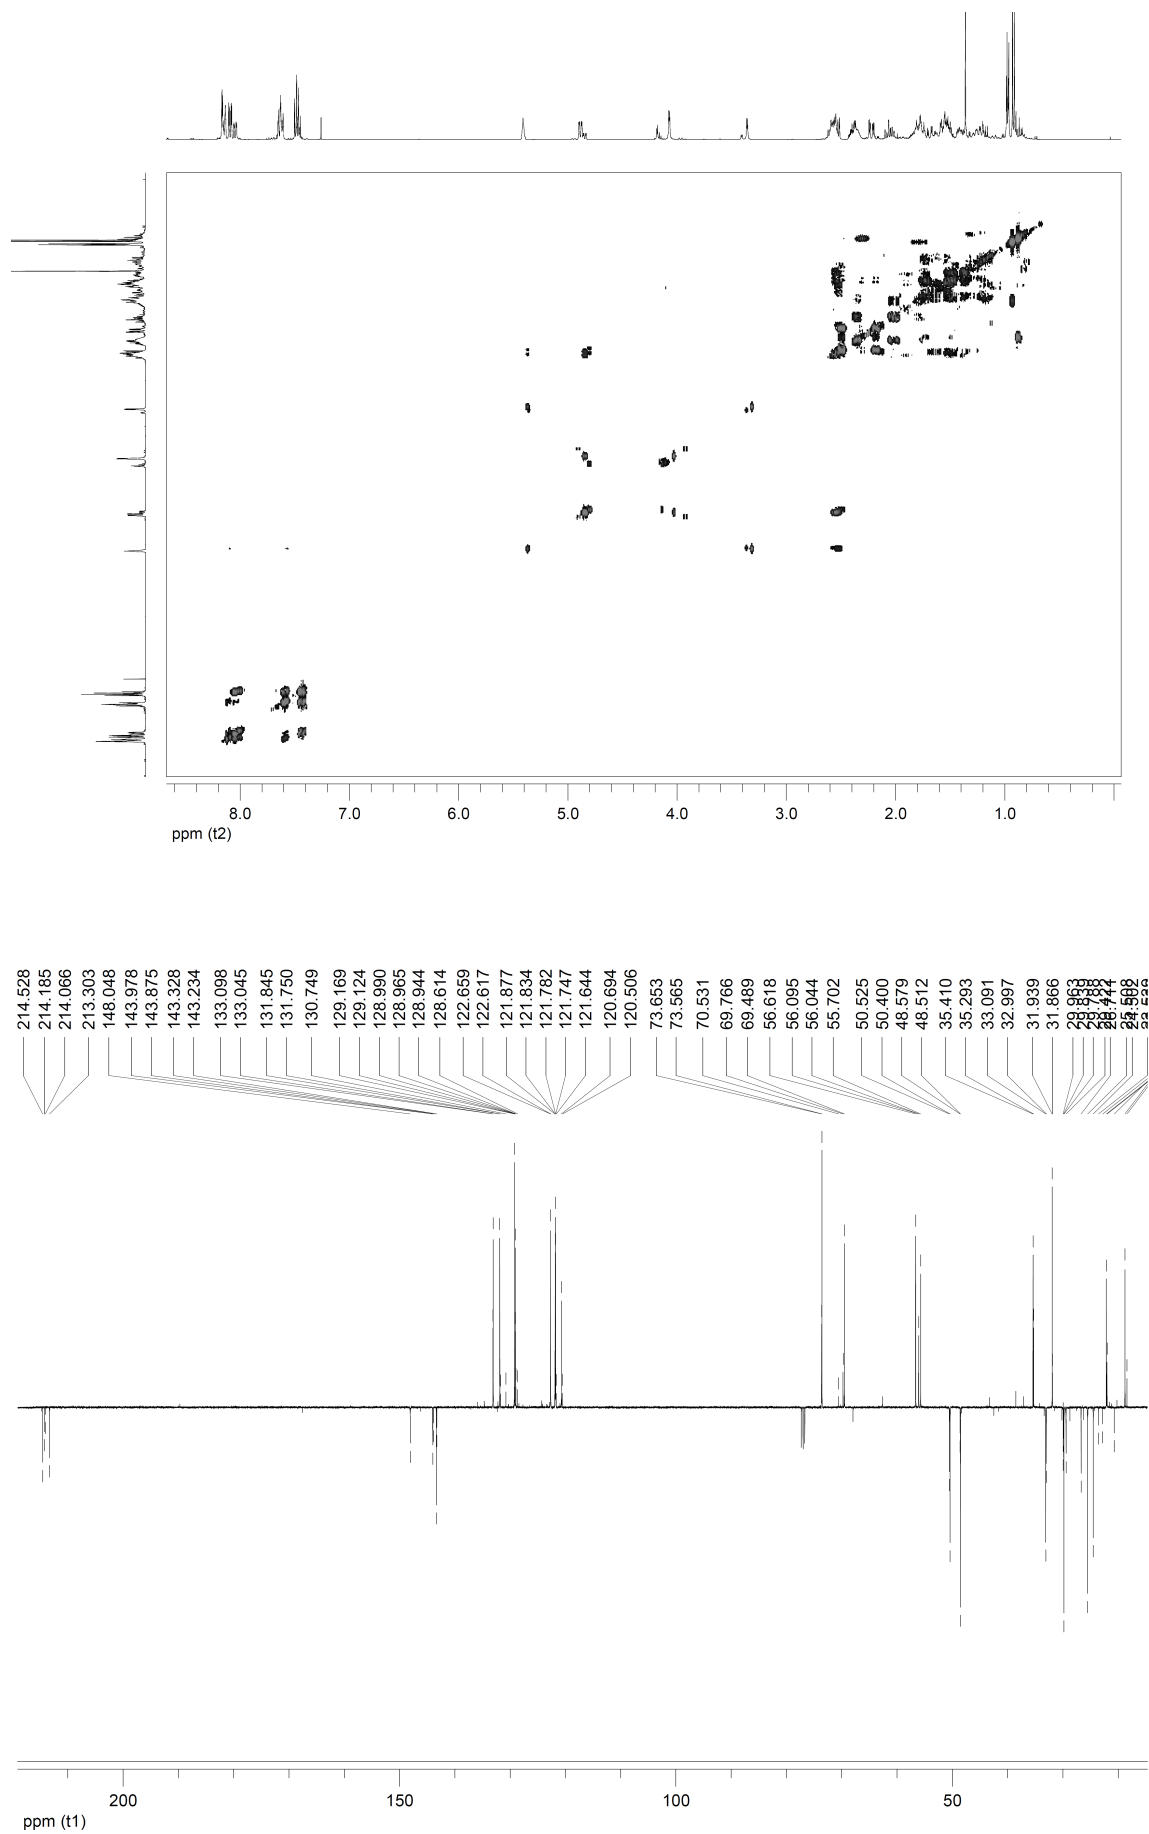

S22

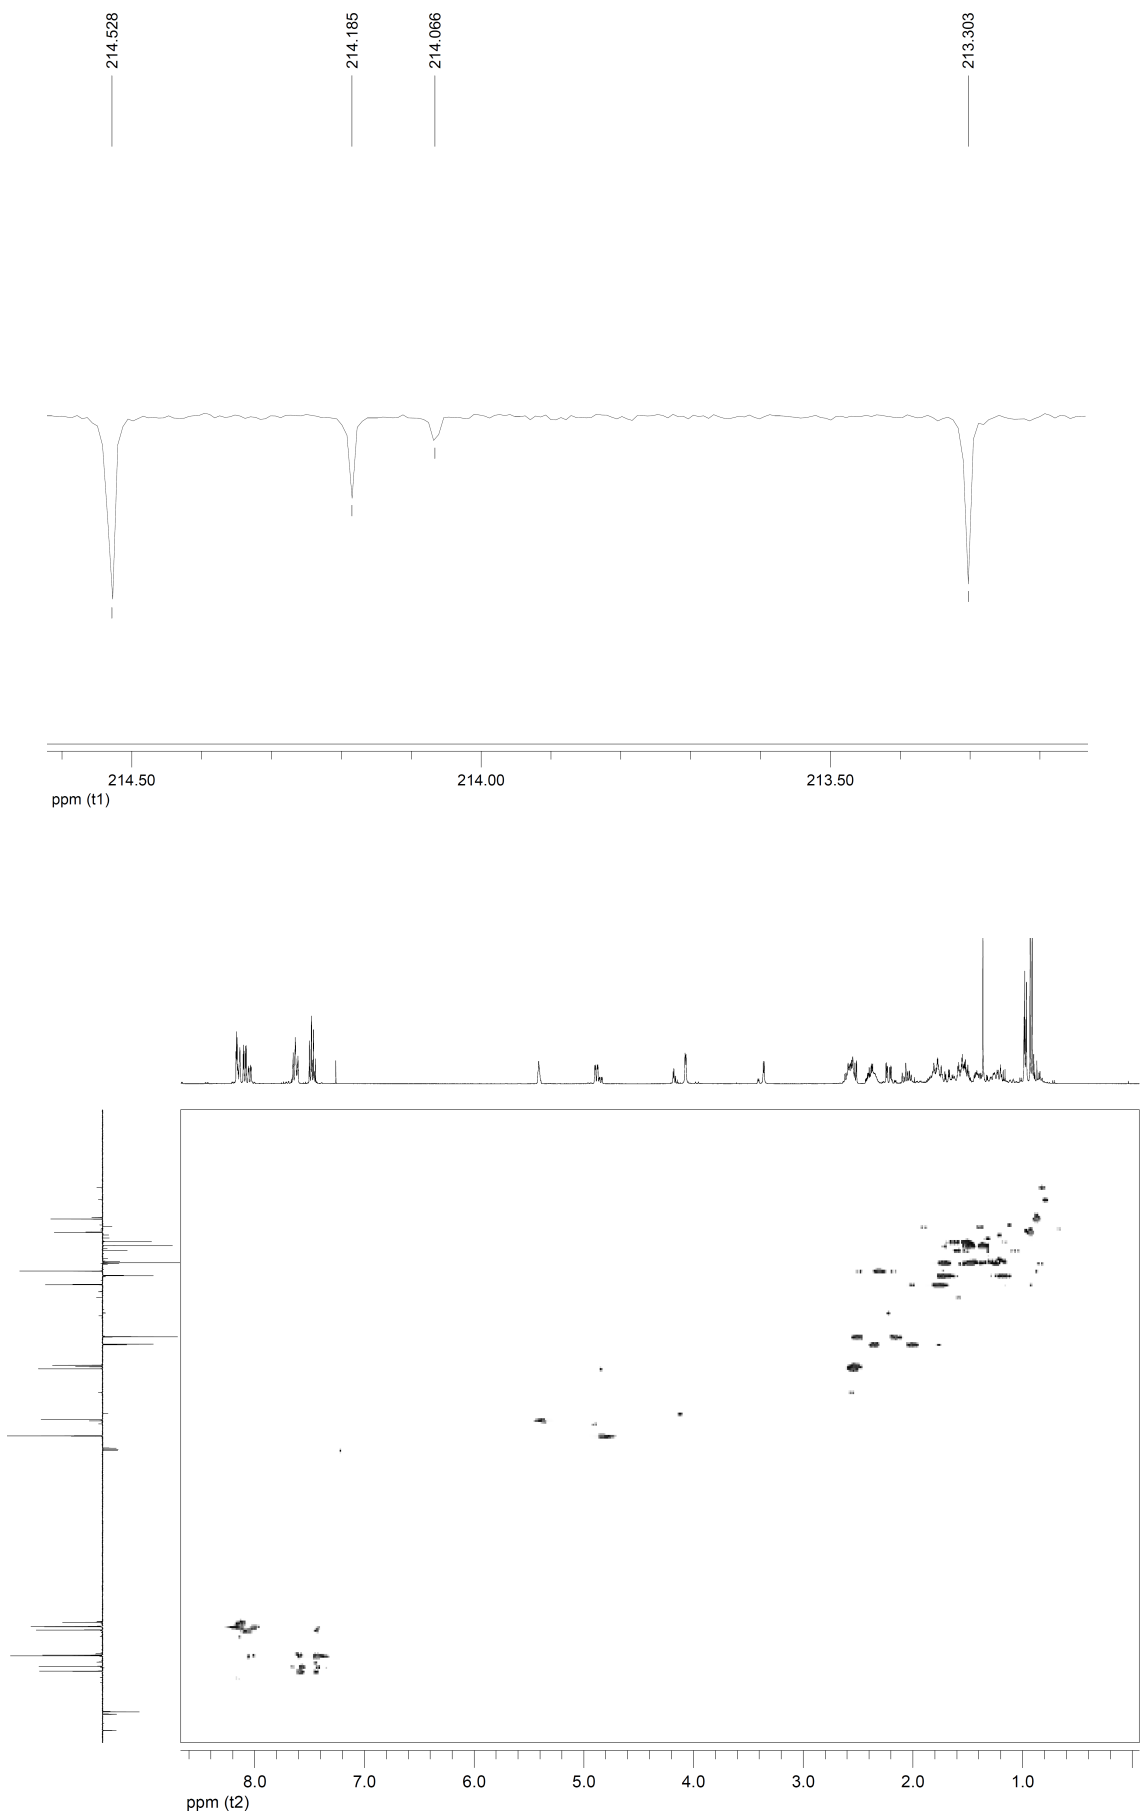

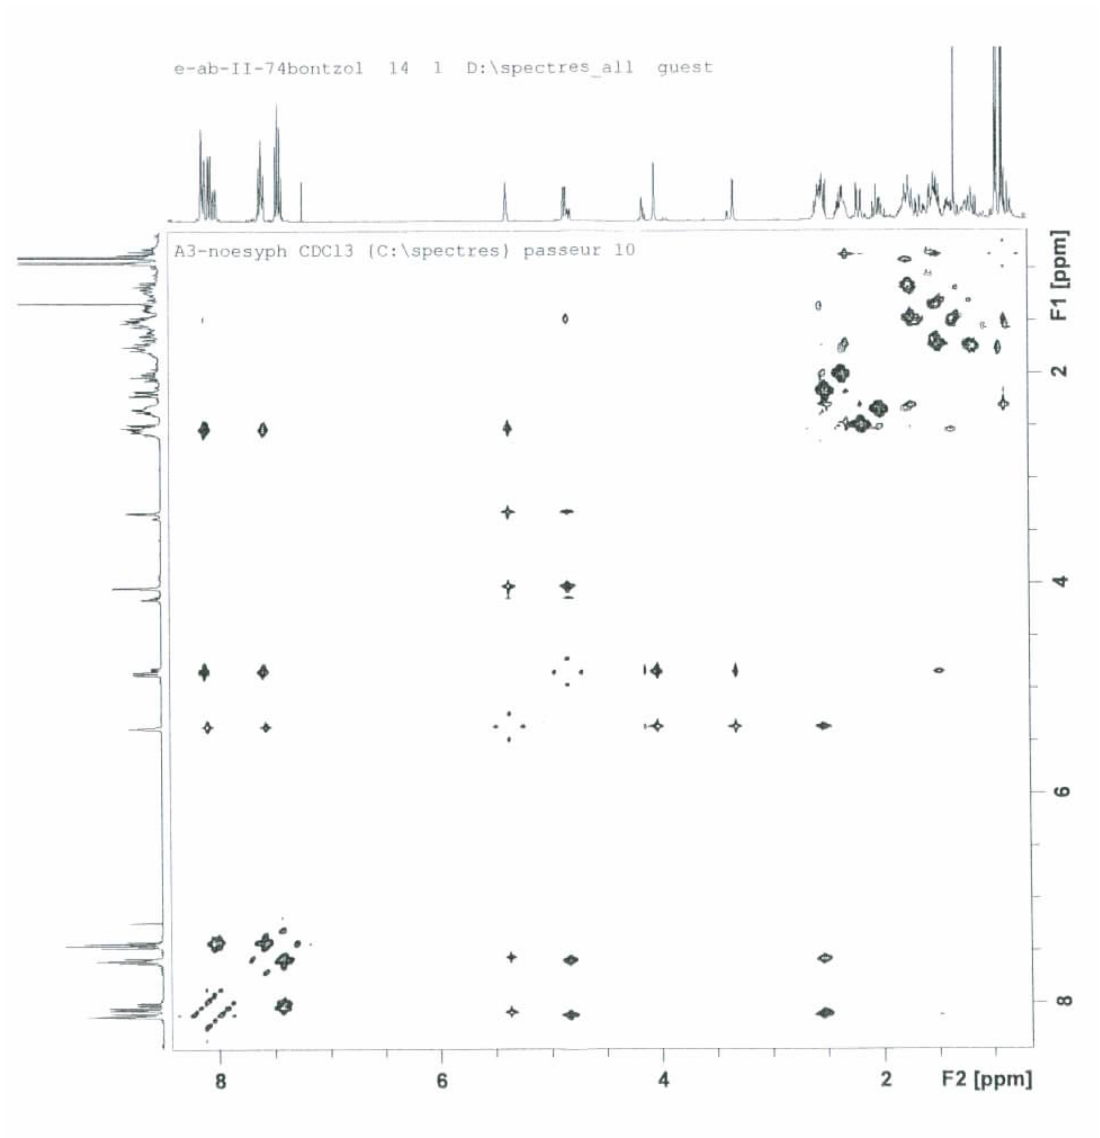

**(R)-3-pyrrolidinol as catalyst with ethyl sugar 2b**

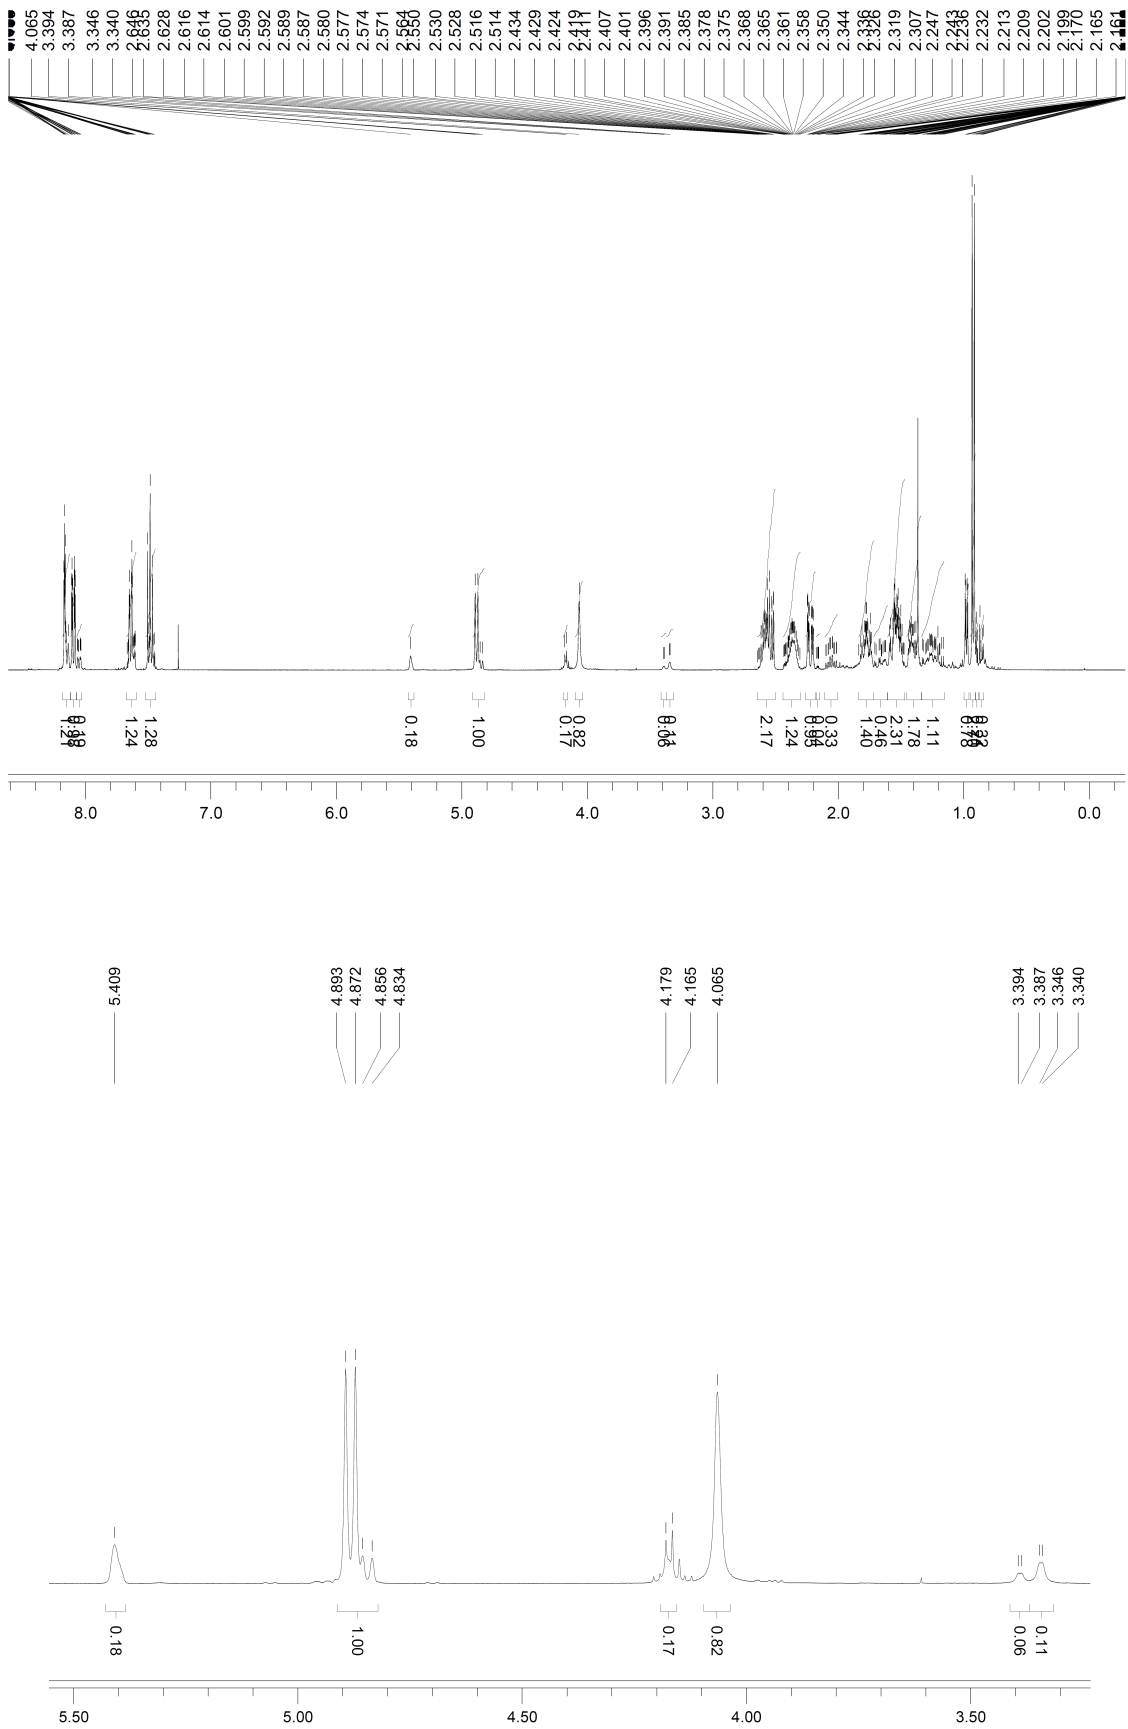

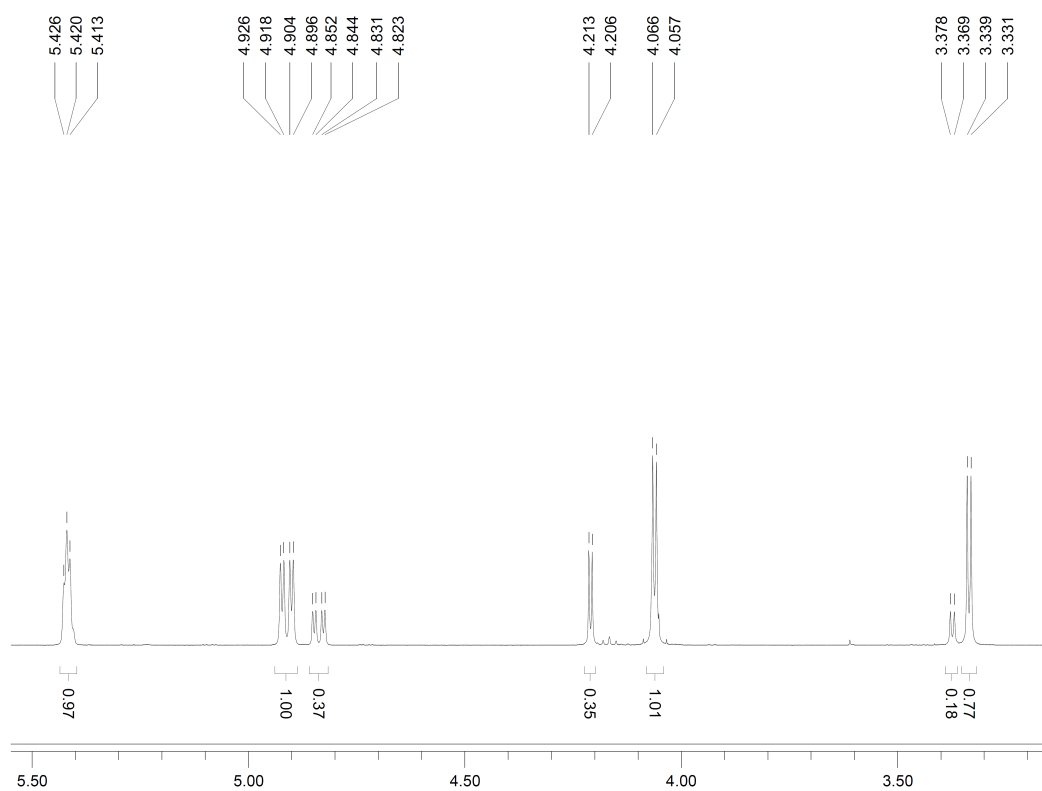

**(R)-3-pyrrolidinol as catalyst with methyl sugar 2a**

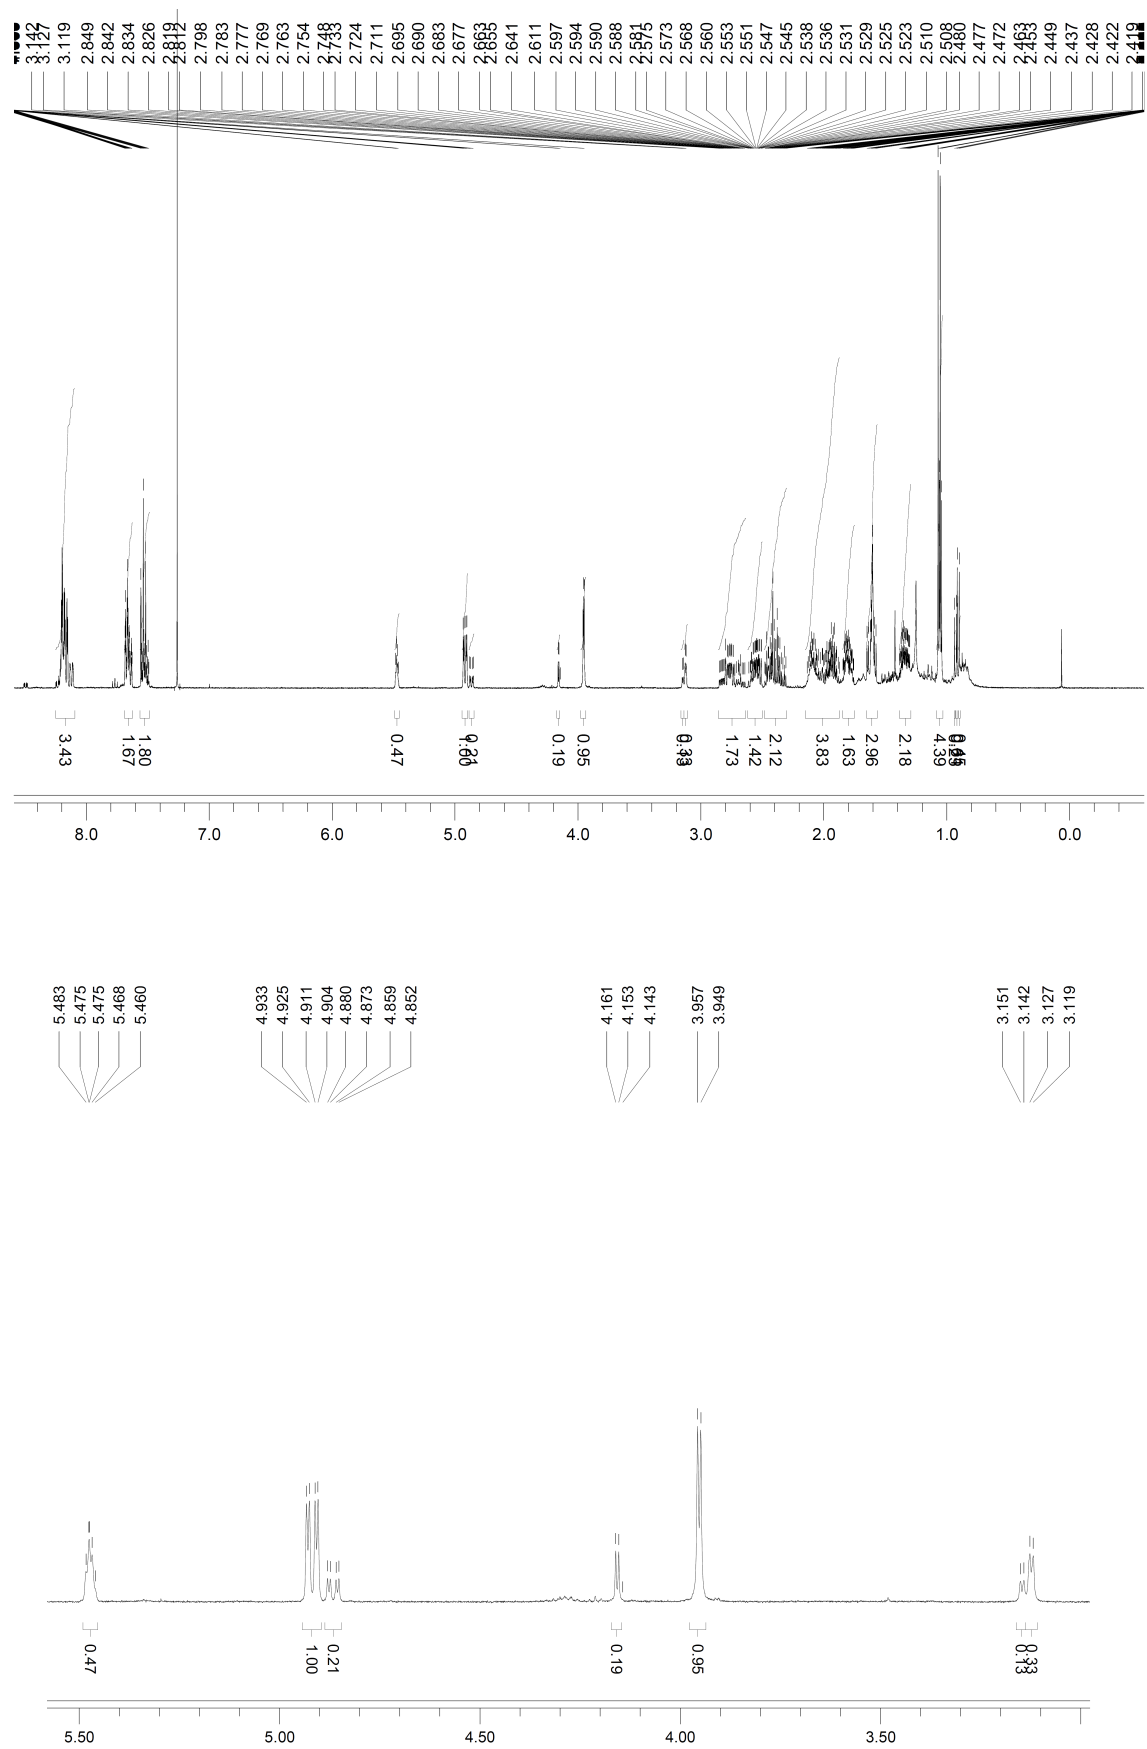



**(R)-3-pyrrolidinol as catalyst with ethyl sugar 2b**

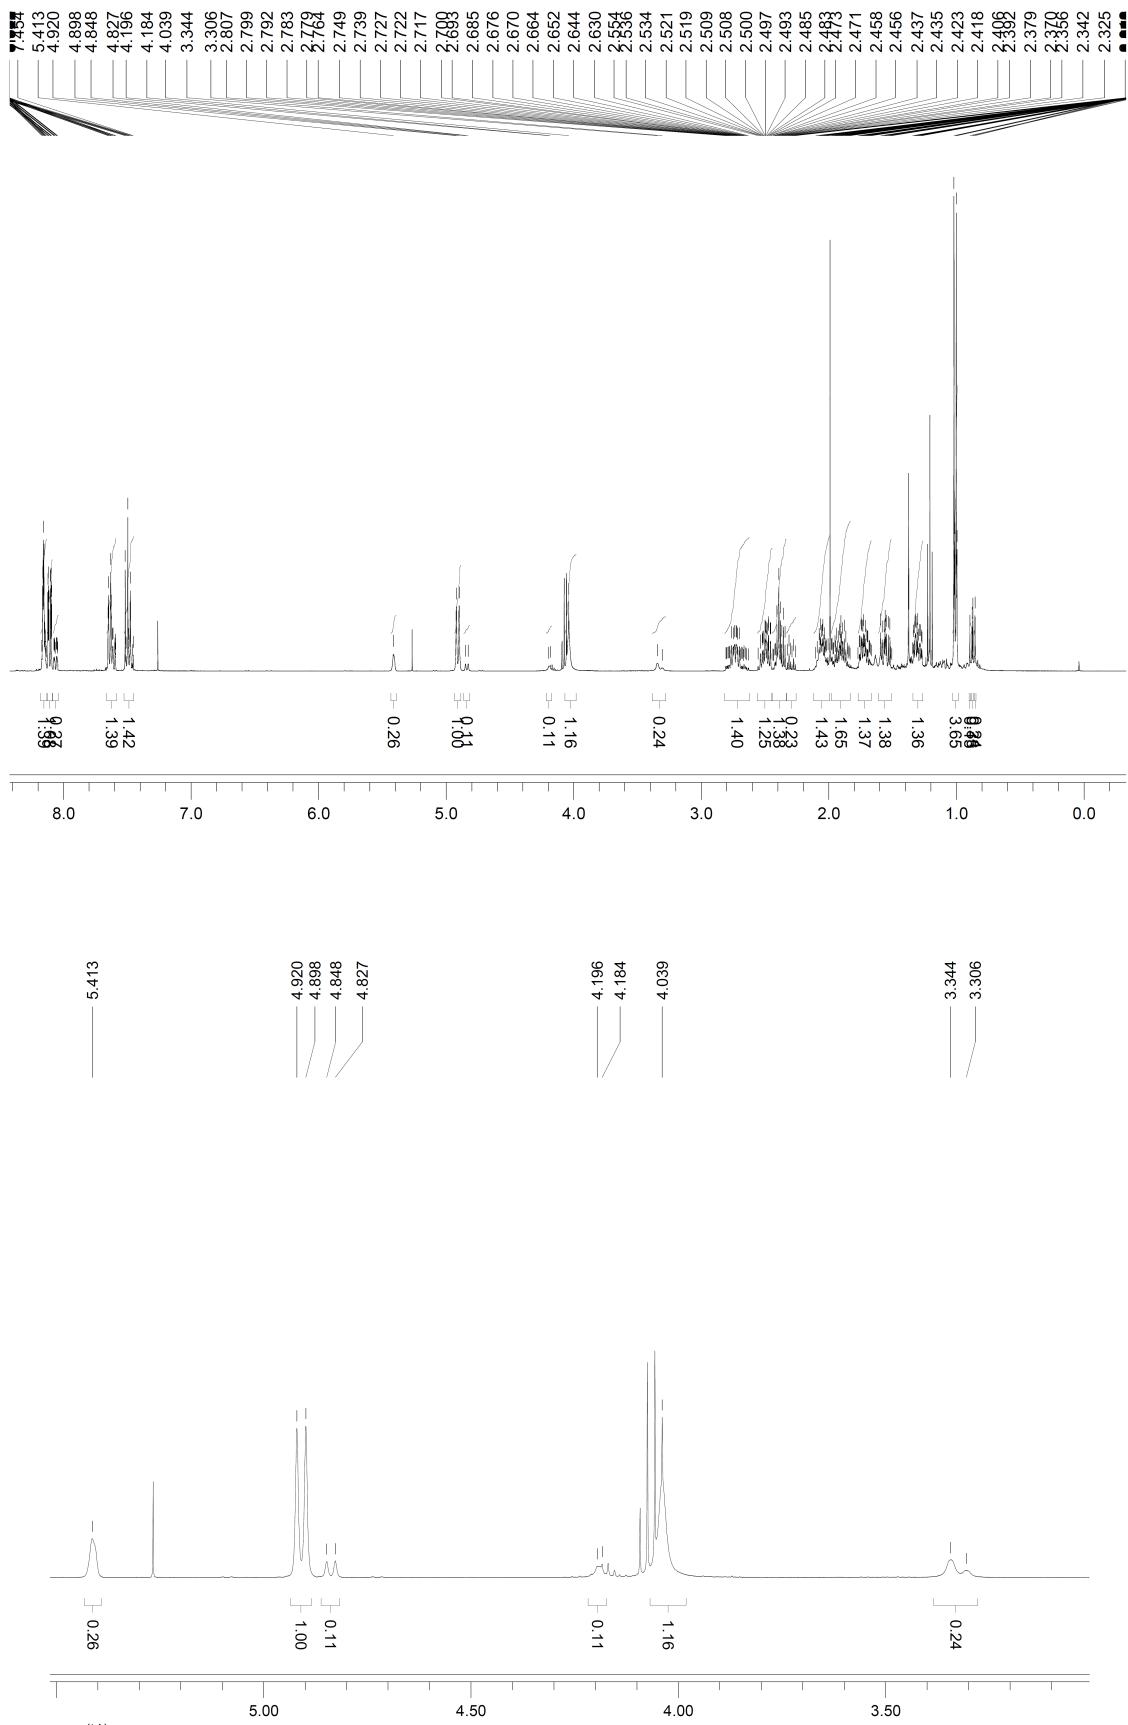

**(R)-3-pyrrolidinol as catalyst with propyl sugar 2c**

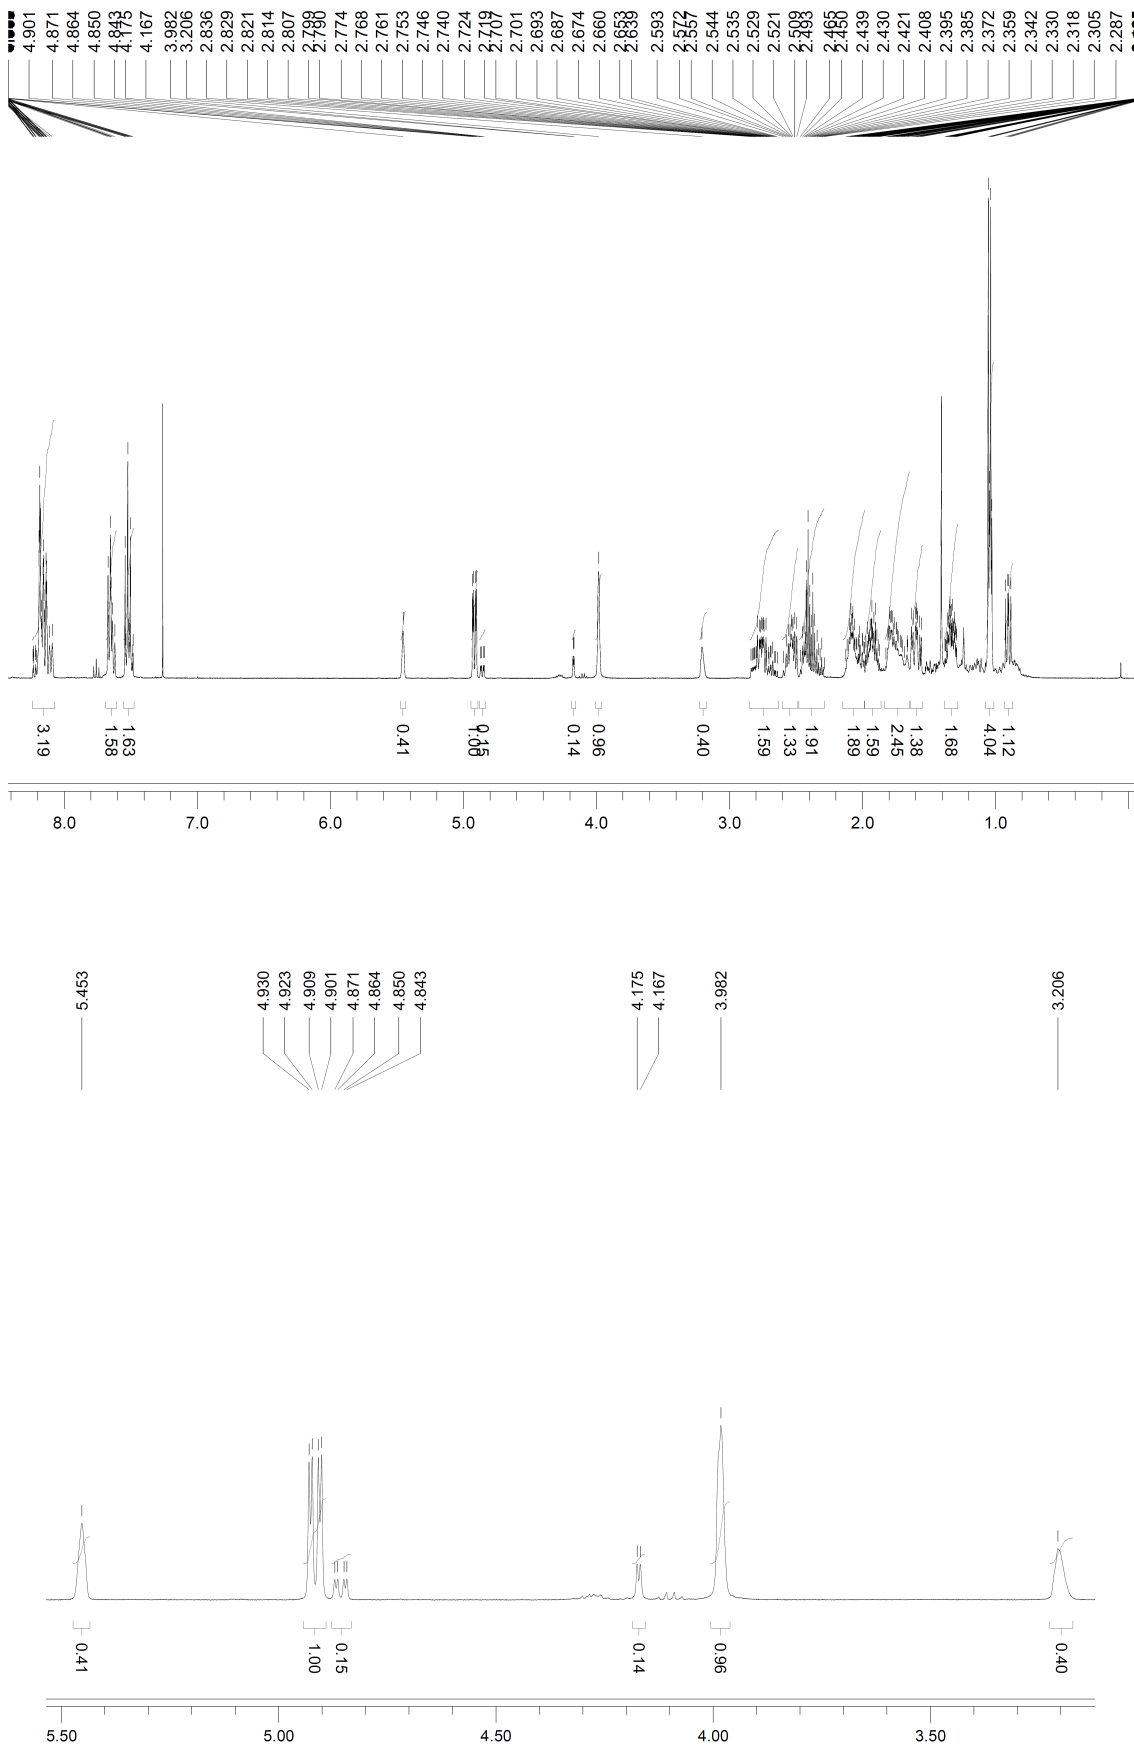

**(R)-3-pyrrolidinol as catalyst with allyl sugar 2d**

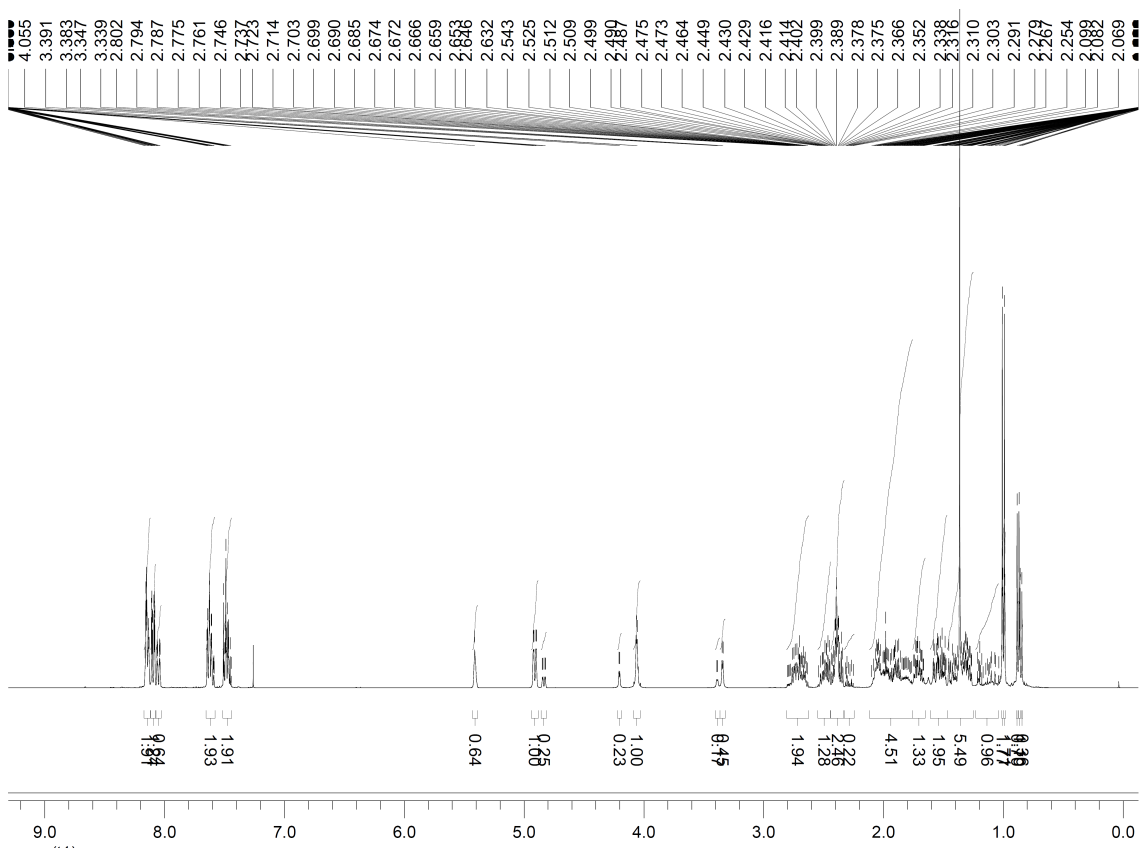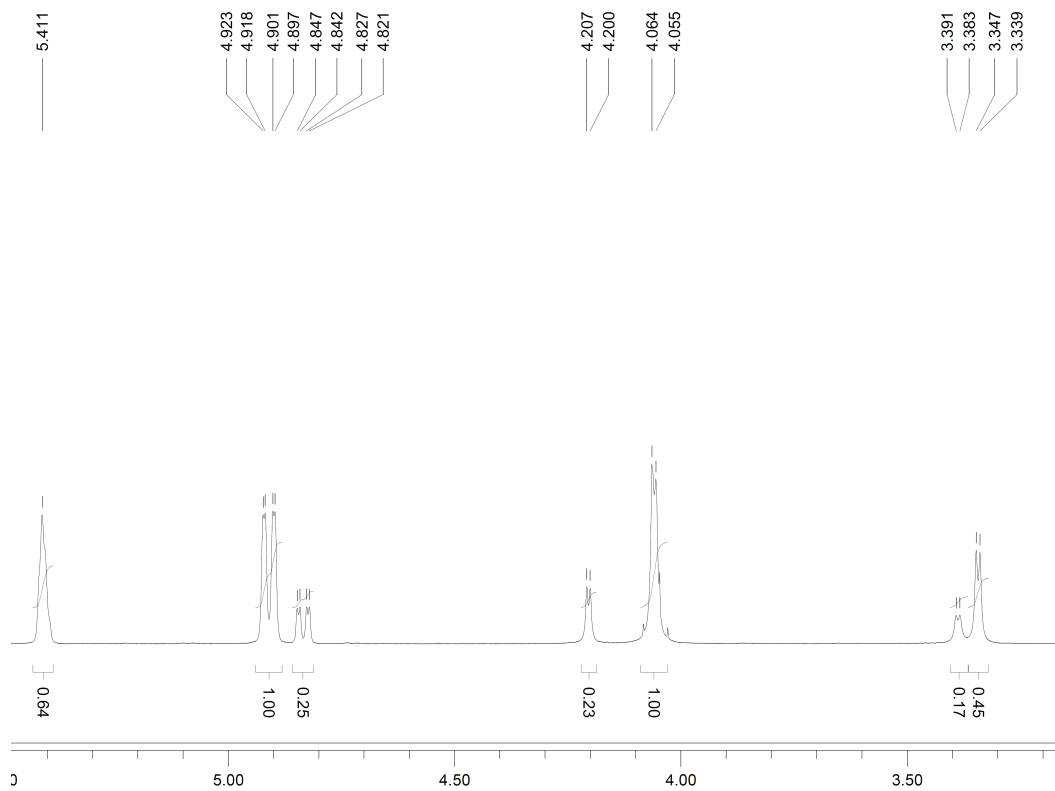

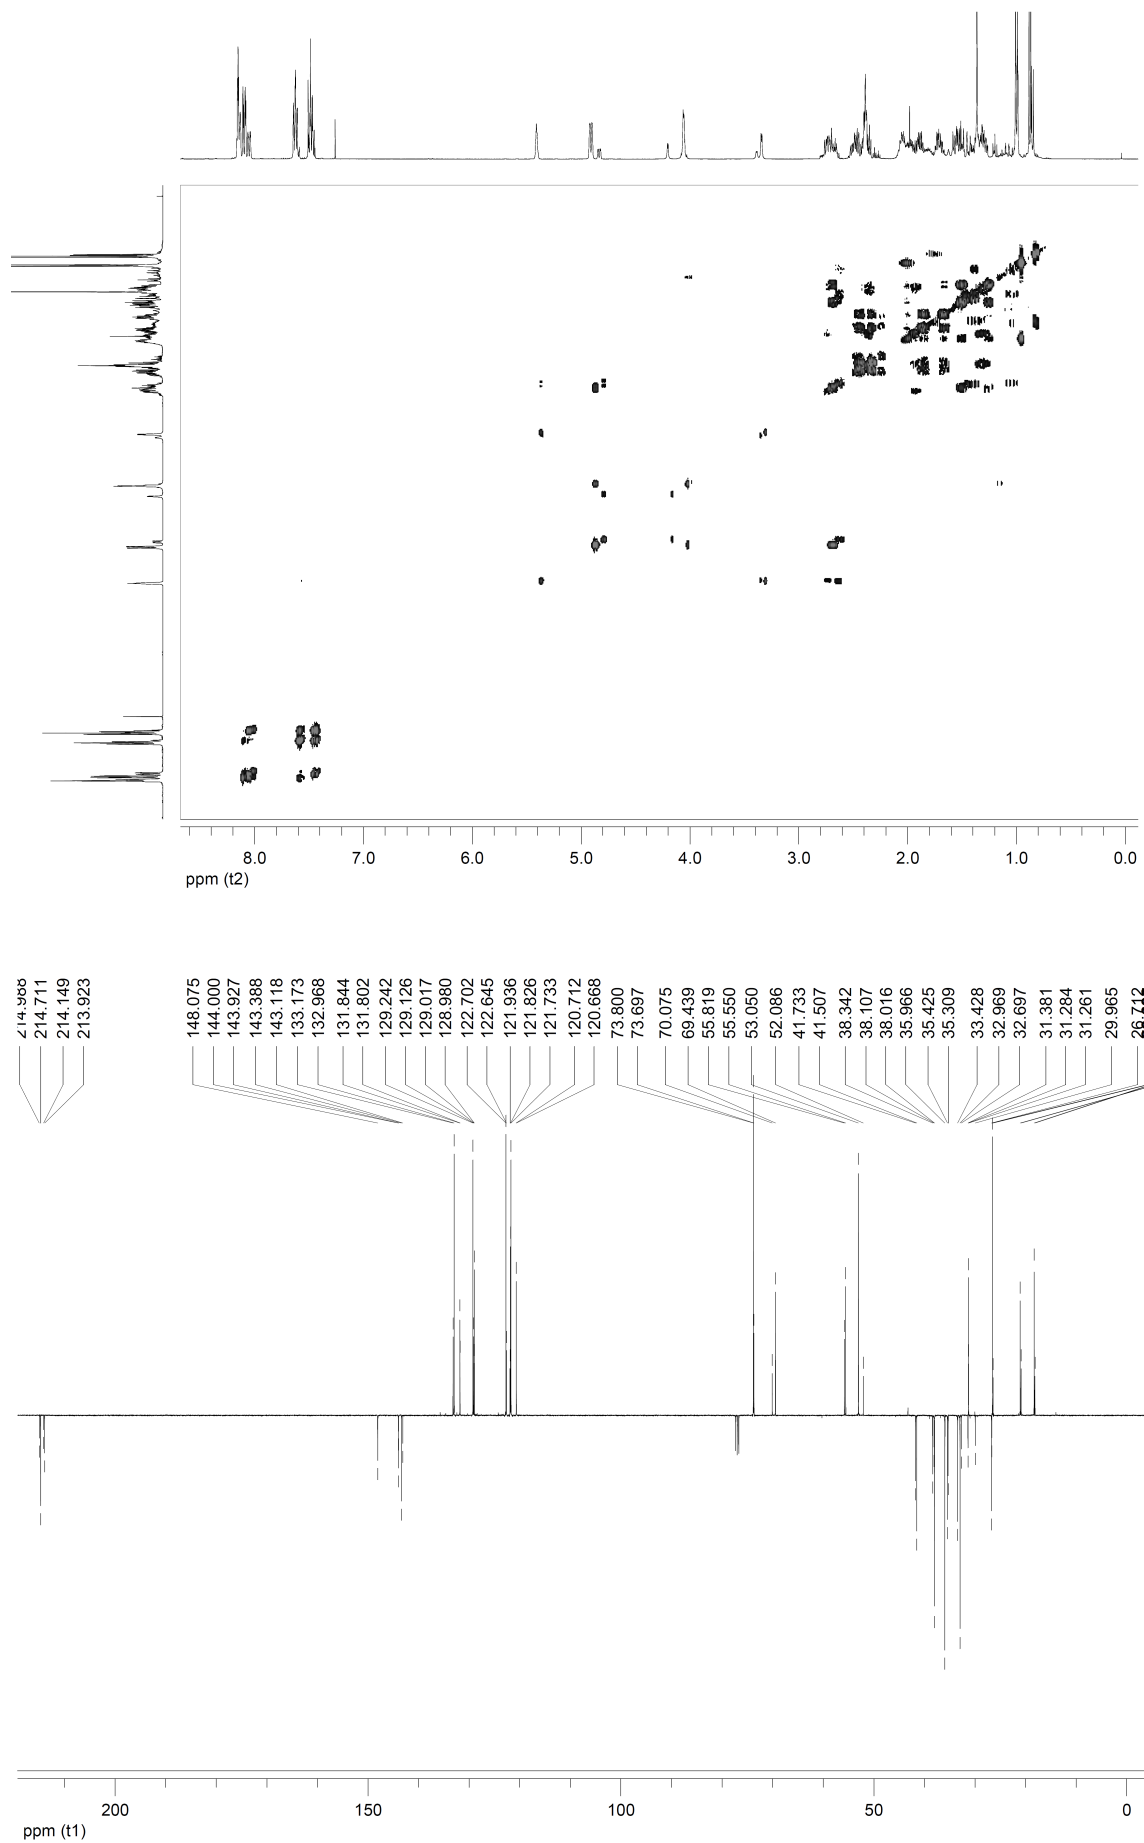

S31

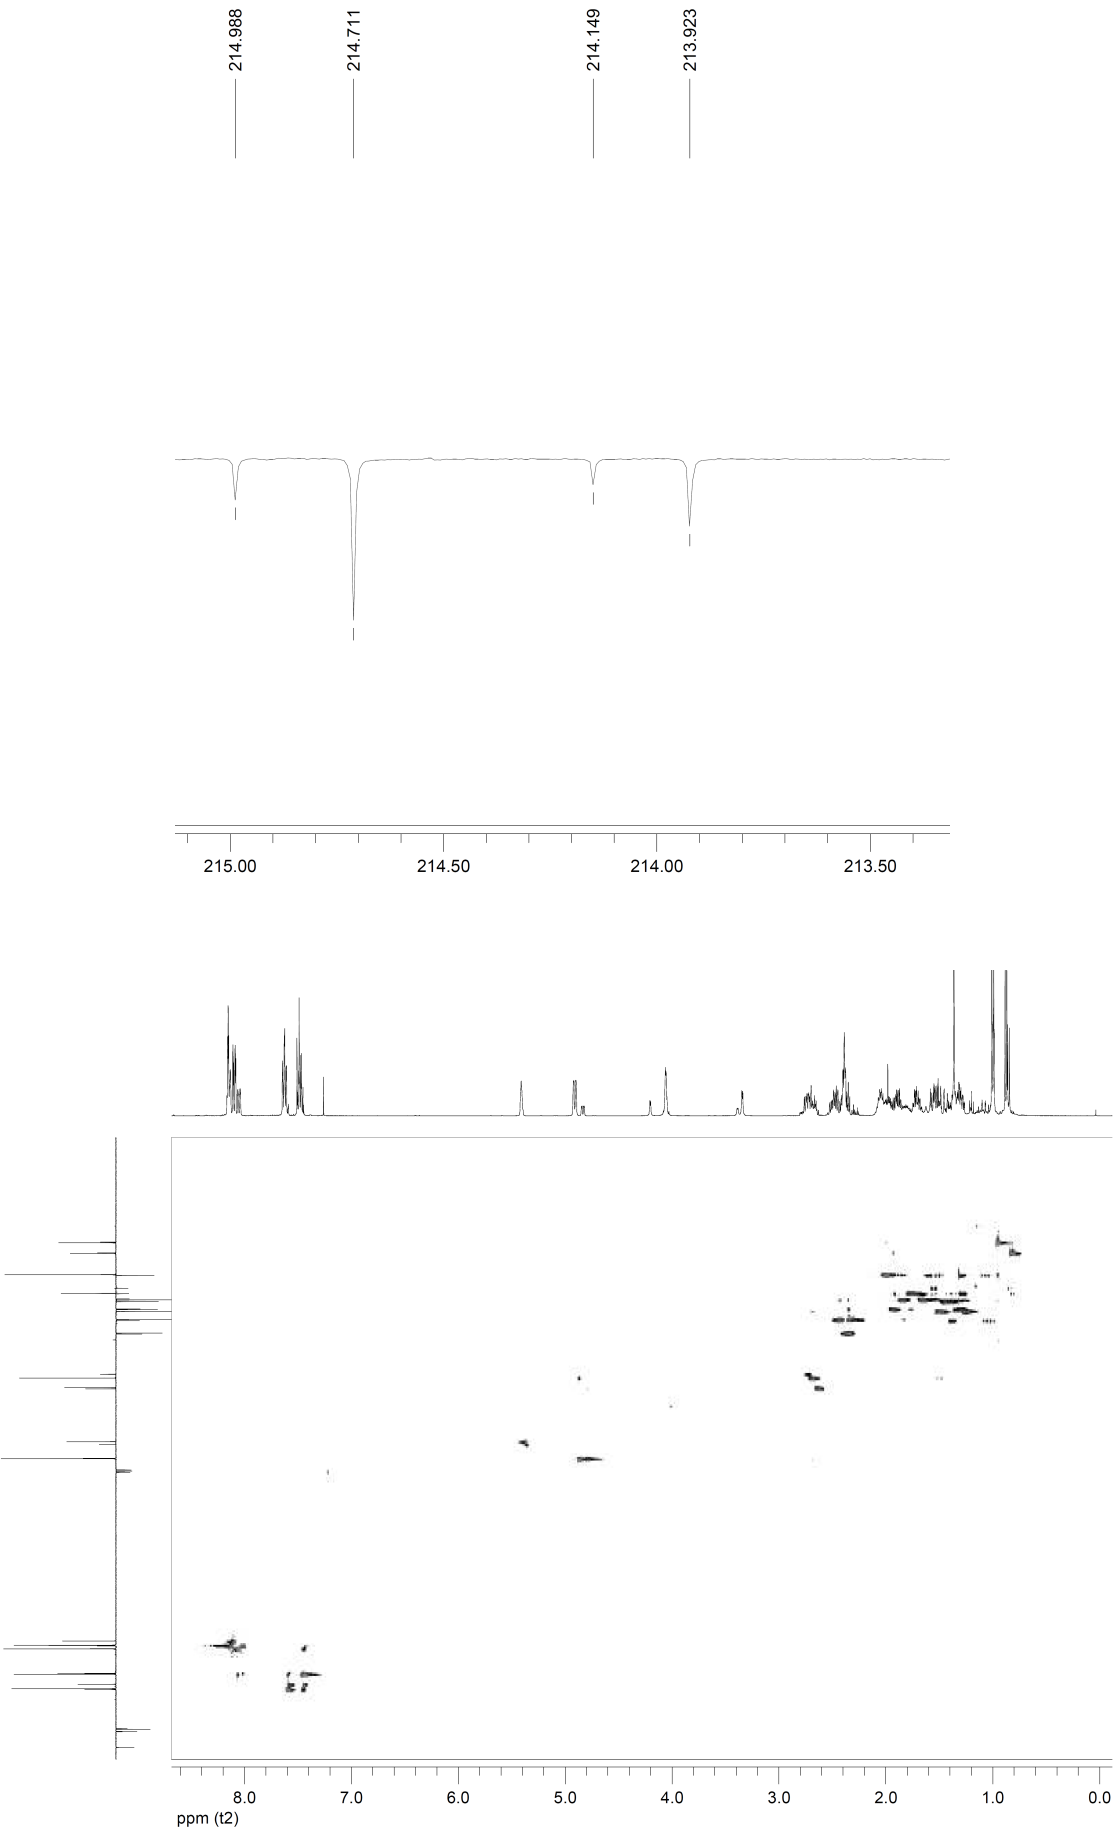

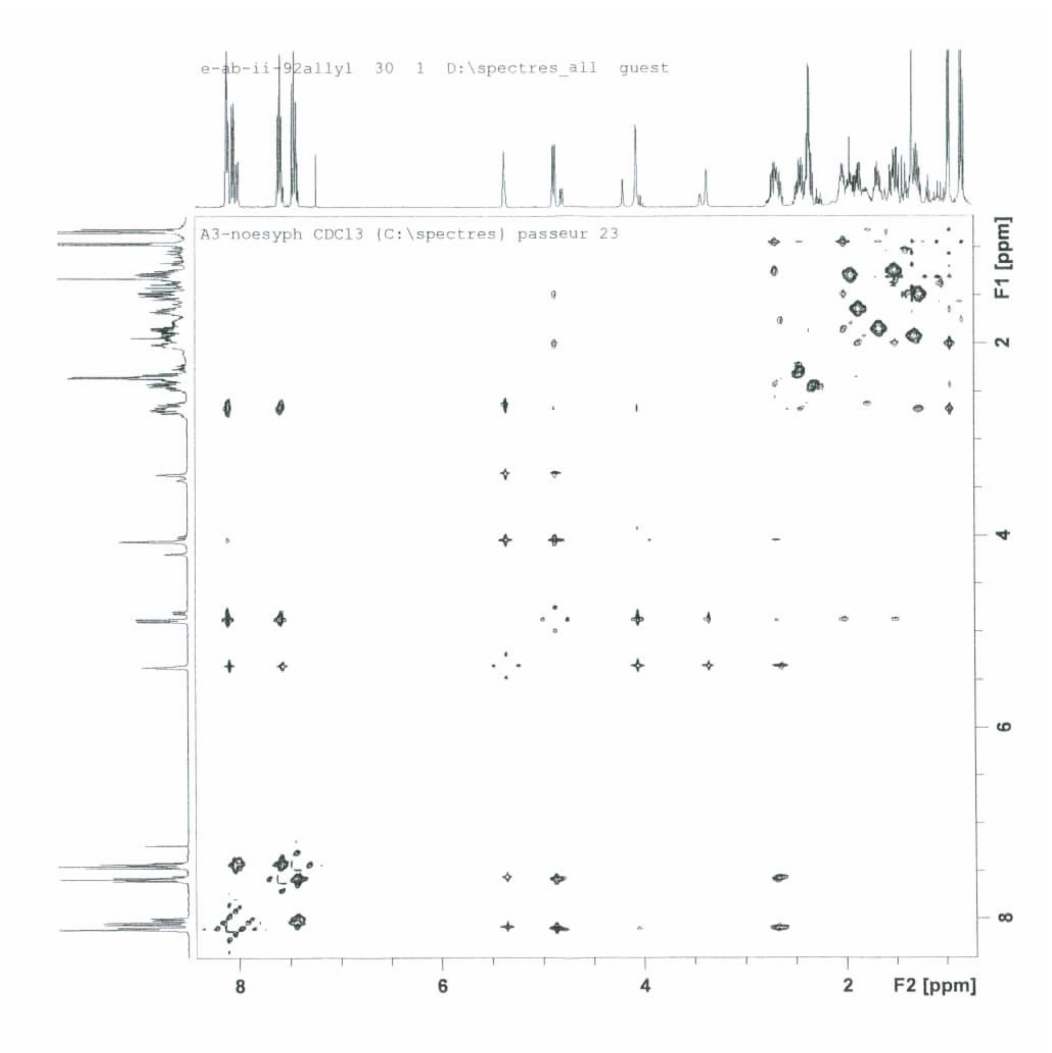

**(R)-3-pyrrolidinol as catalyst with pentenyl sugar 2e**

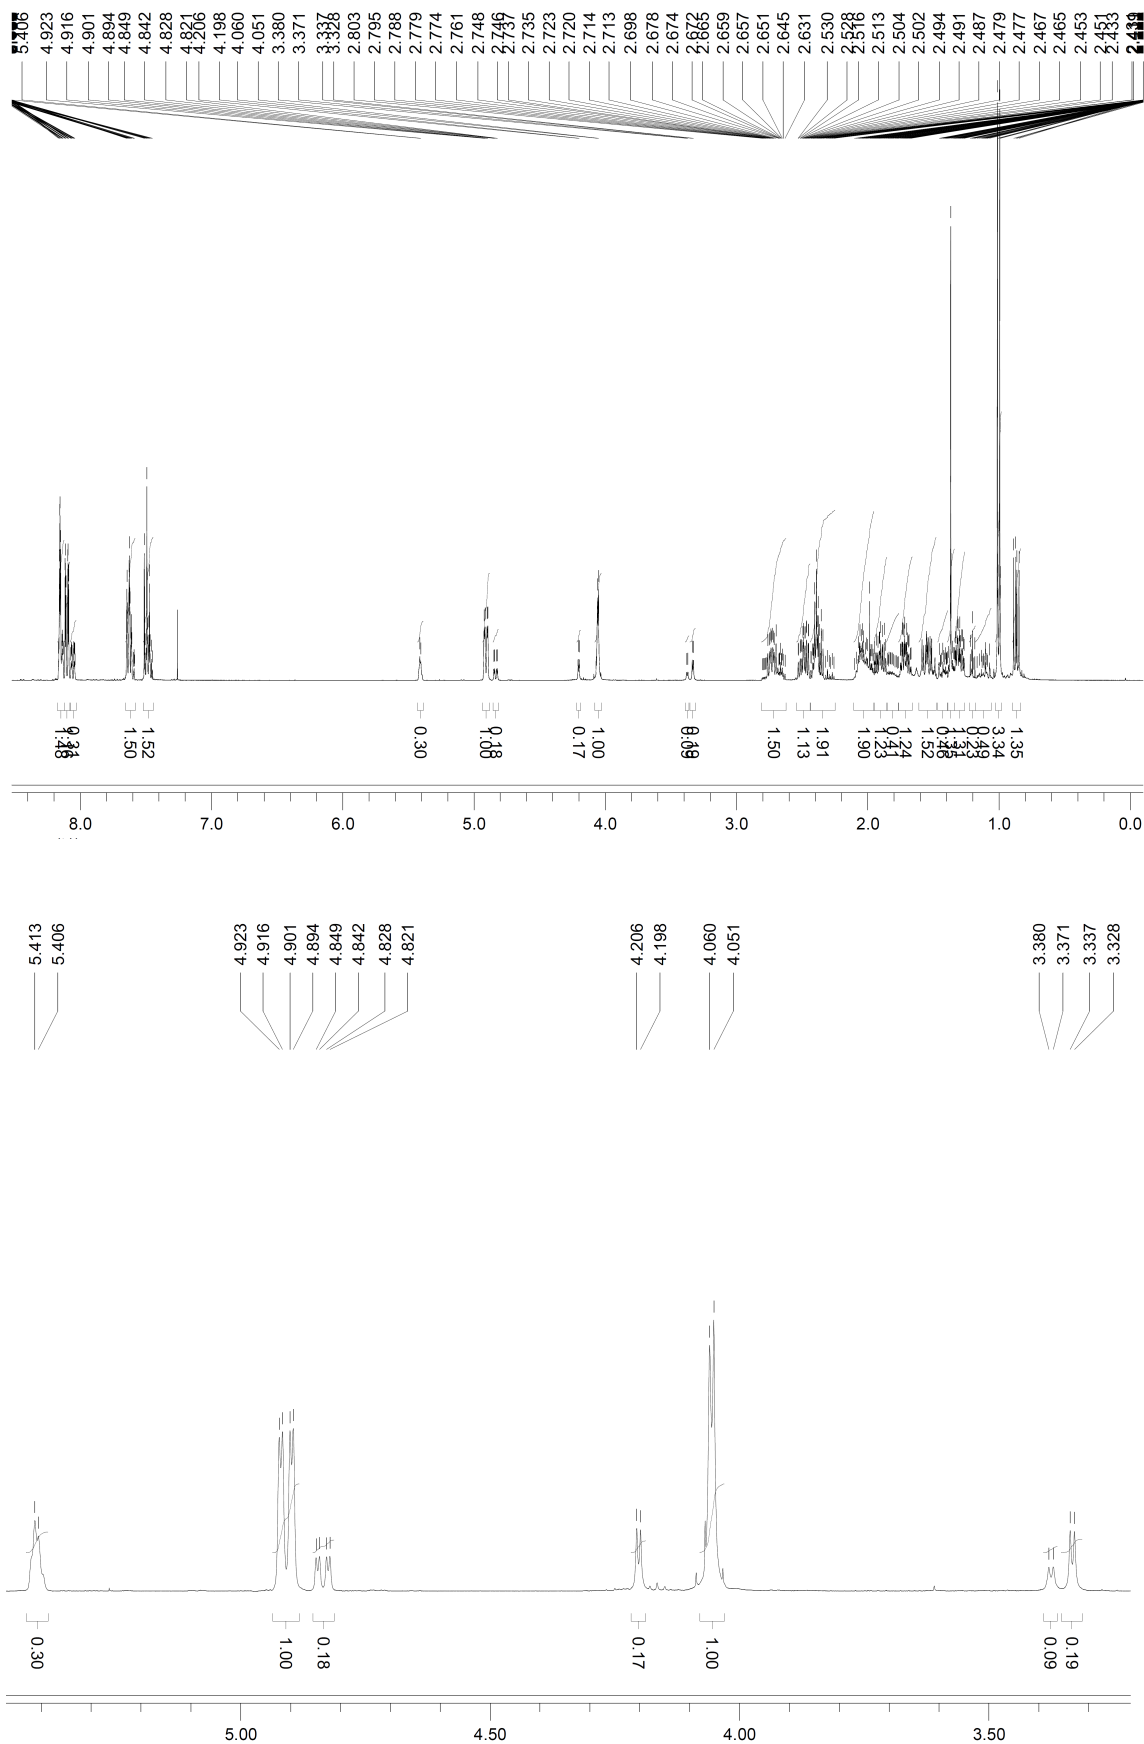

Compound 7

(R)-3-pyrrolidinol as catalyst in water

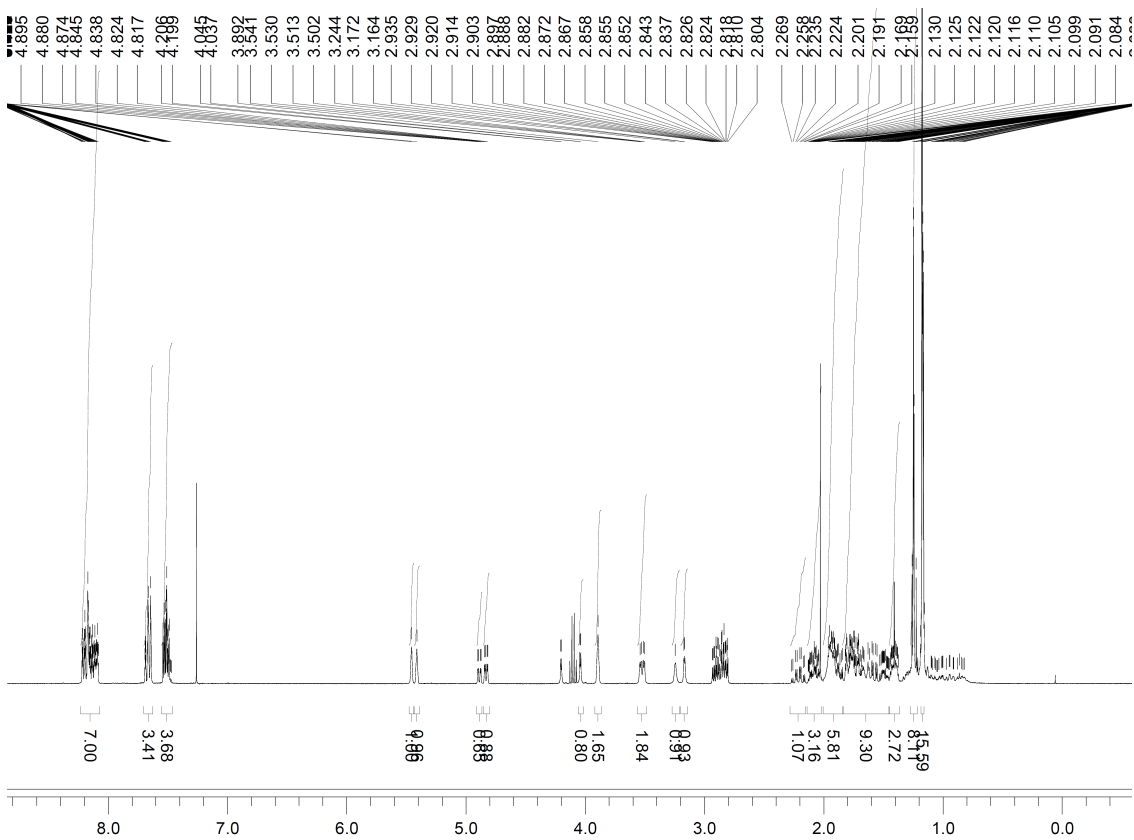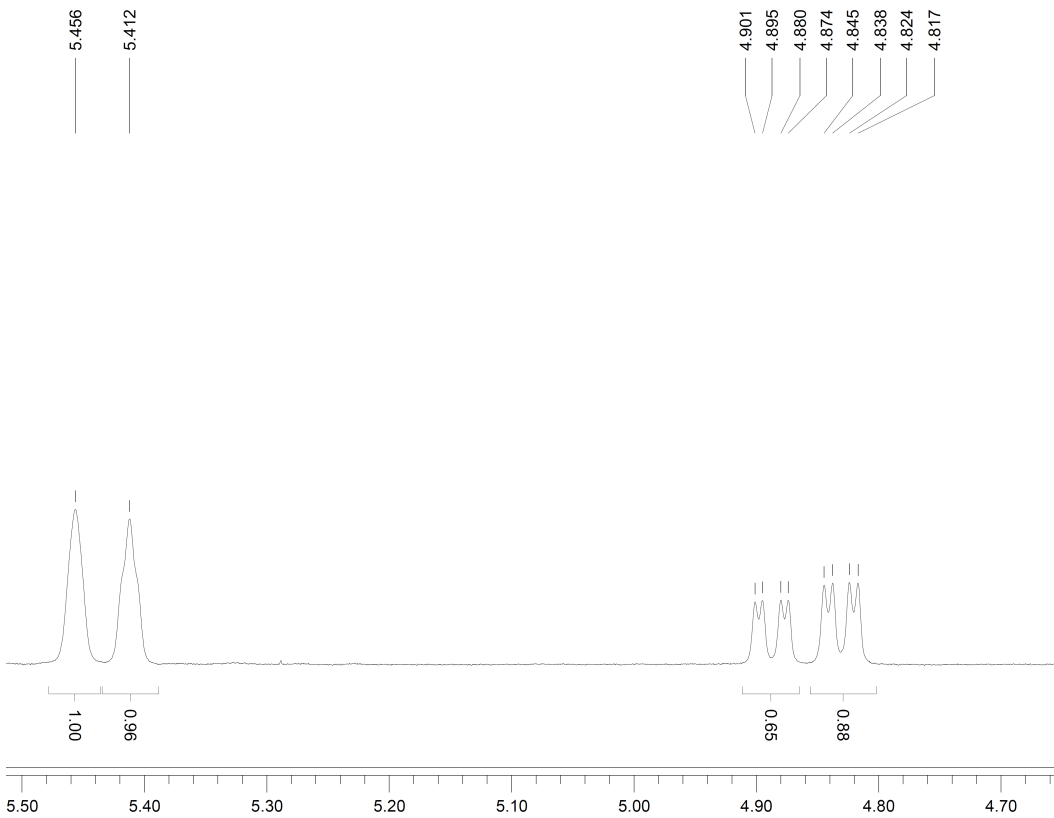



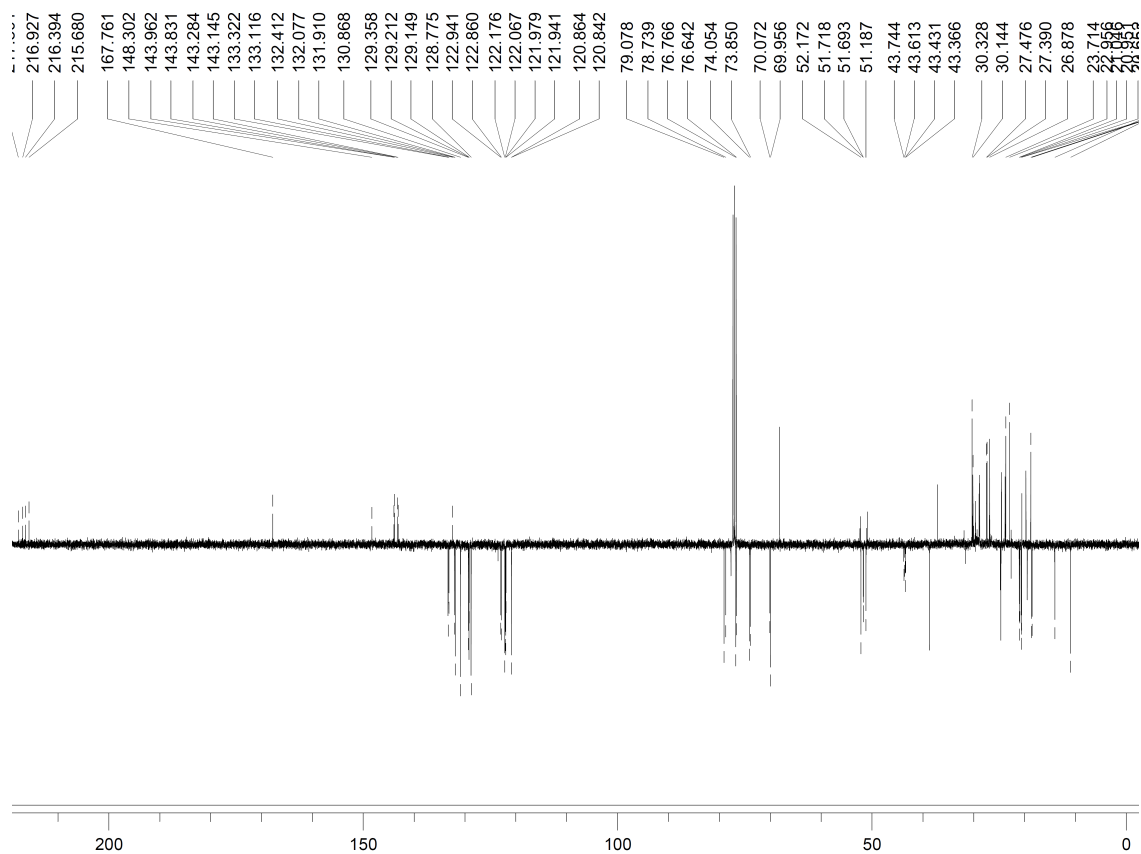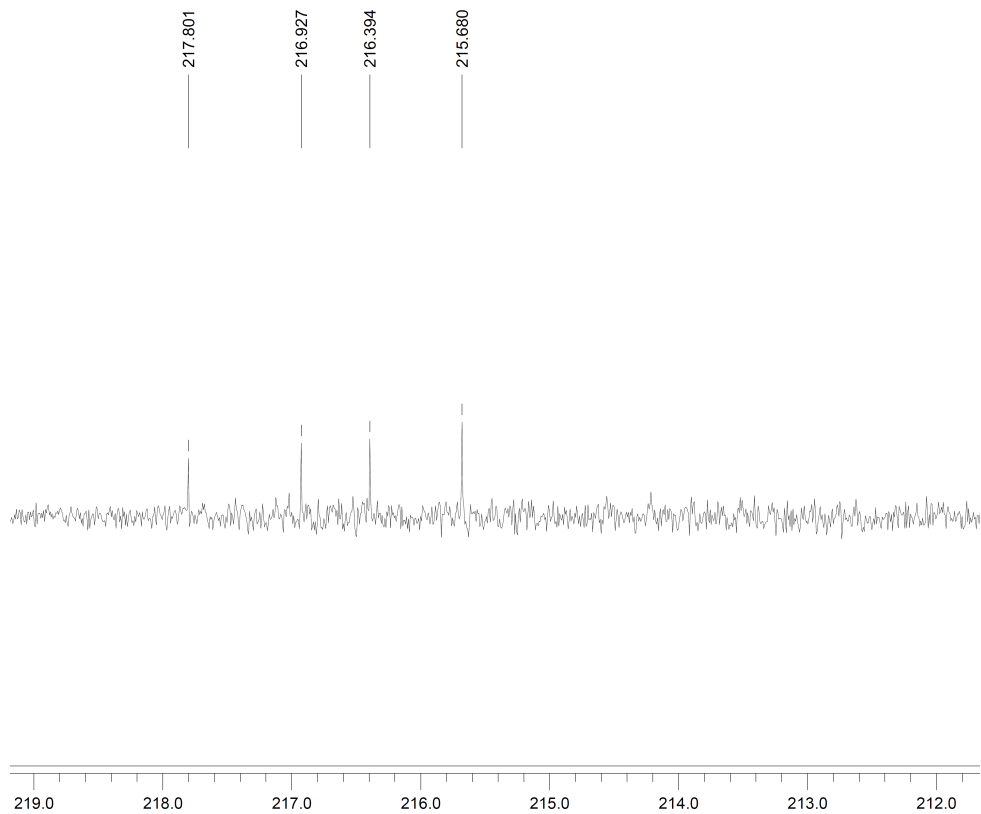

**(R)-3-pyrrolidinol as catalyst with ethyl sugar 2b**

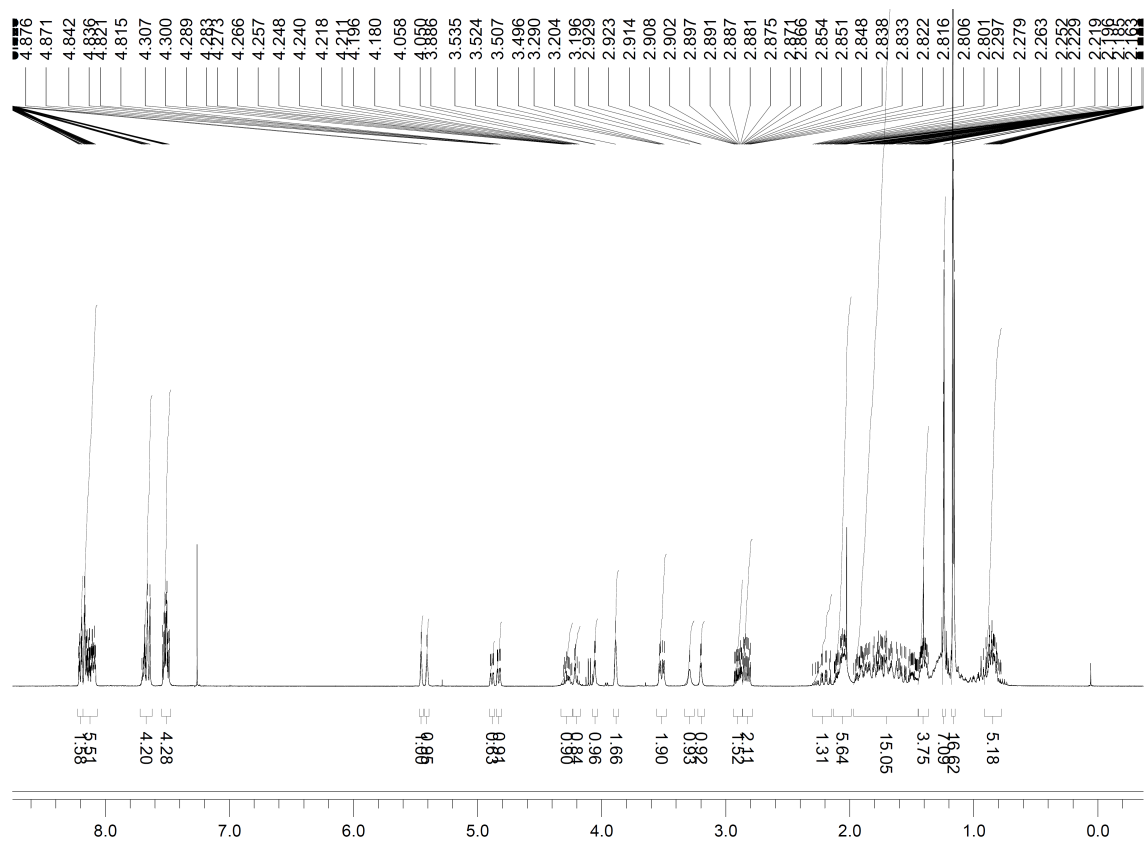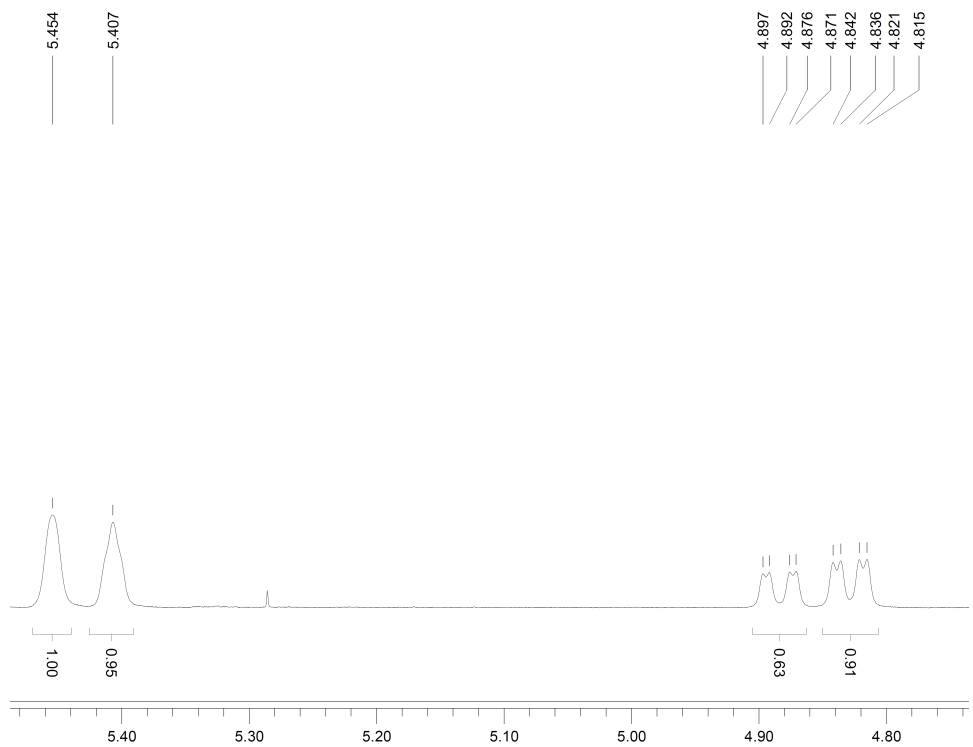

**Europium experiments**

***Compound 3 - Ethanolamine as catalyst in water***

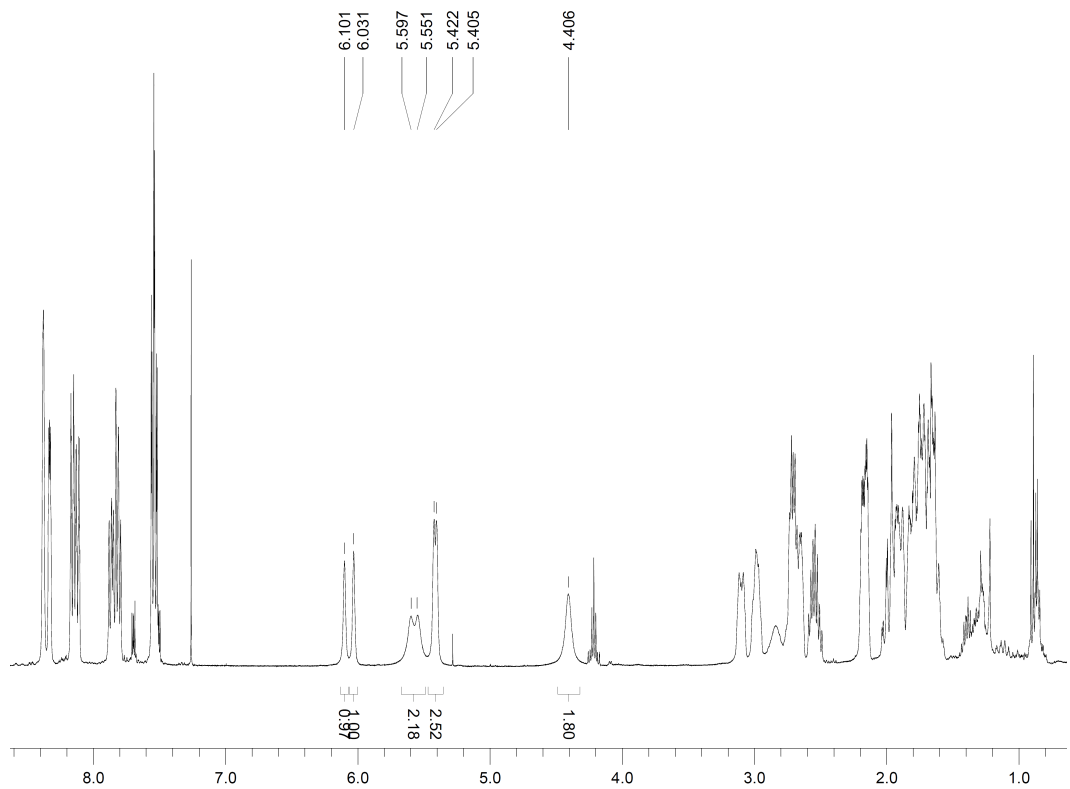

***Compound 3 - Ethanolamine as catalyst with ethyl sugar 2b***

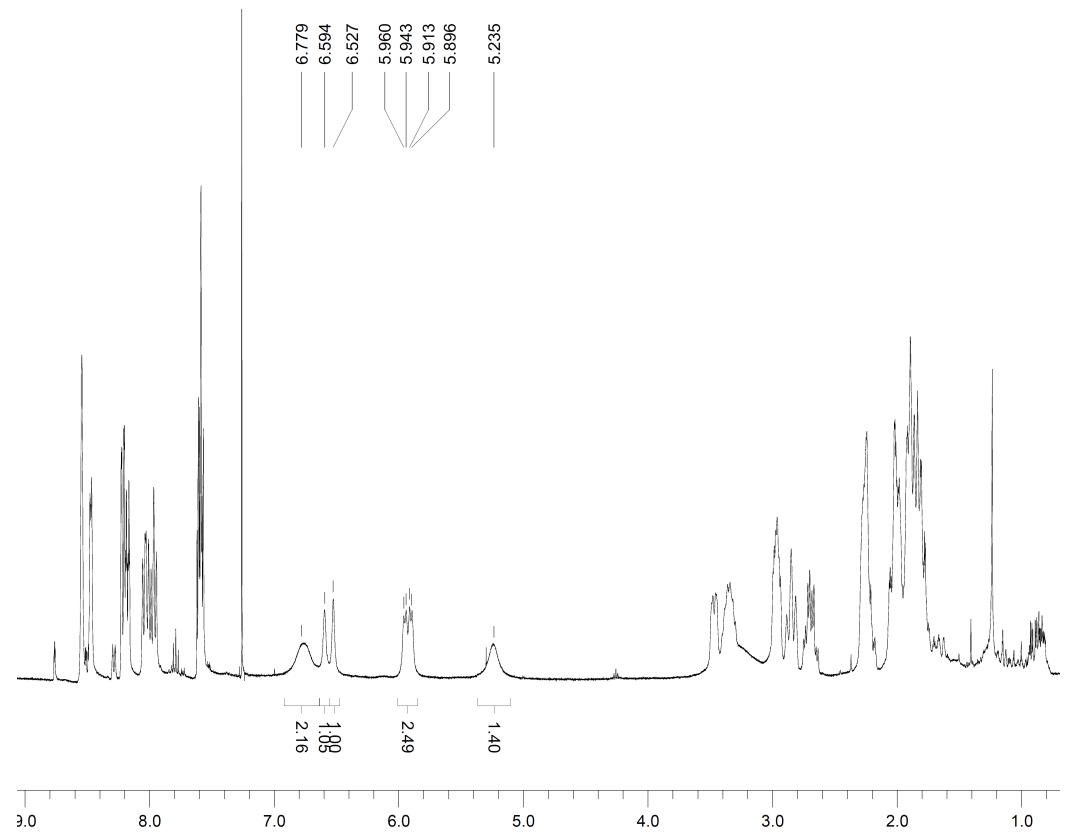

**Compound 3 - (R)-3-pyrrolidinol as catalyst in water**

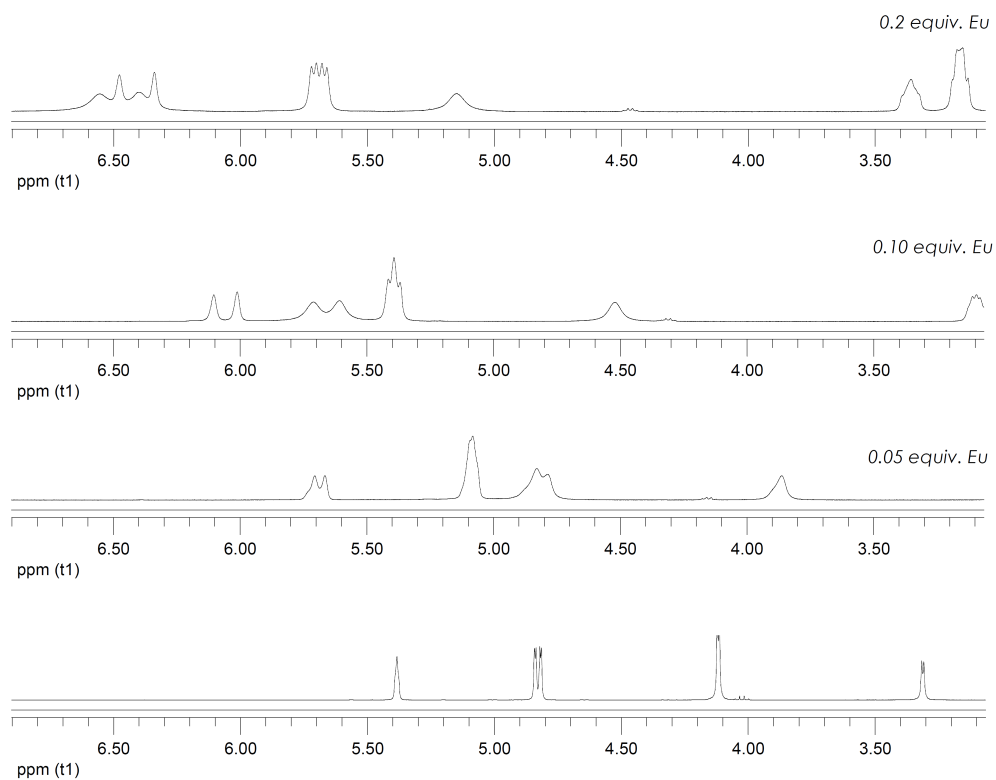

**Compound 3 - (R)-3-pyrrolidinol as catalyst with ethyl sugar 2b**

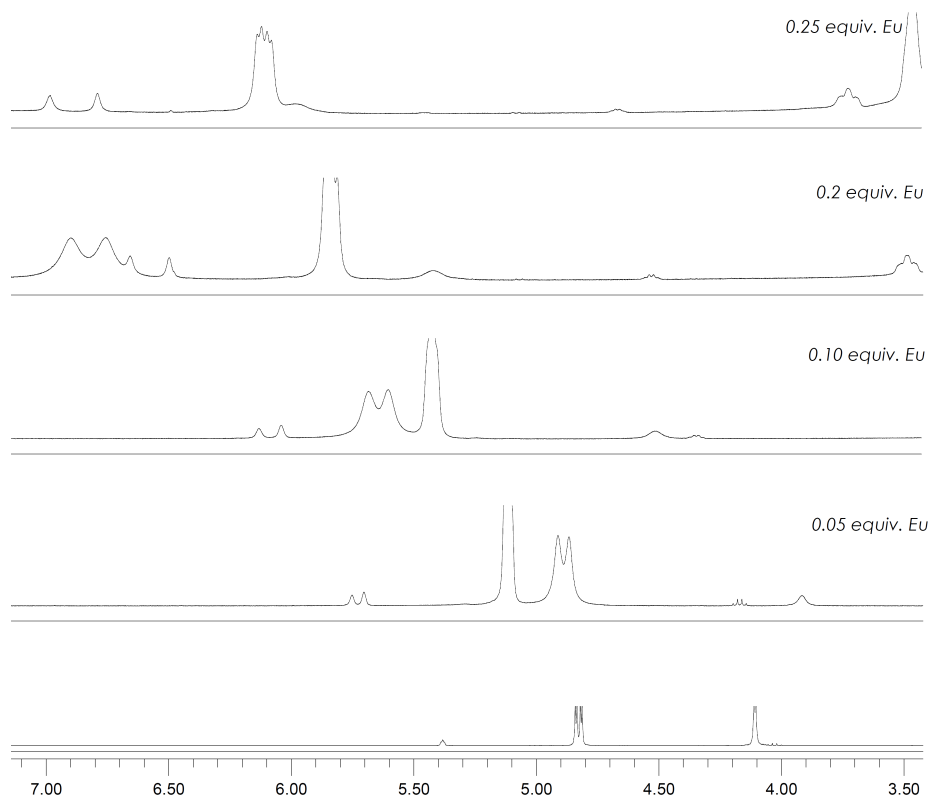

**Compound 3 - (R)-3-pyrrolidinol as catalyst with saccharose 1**

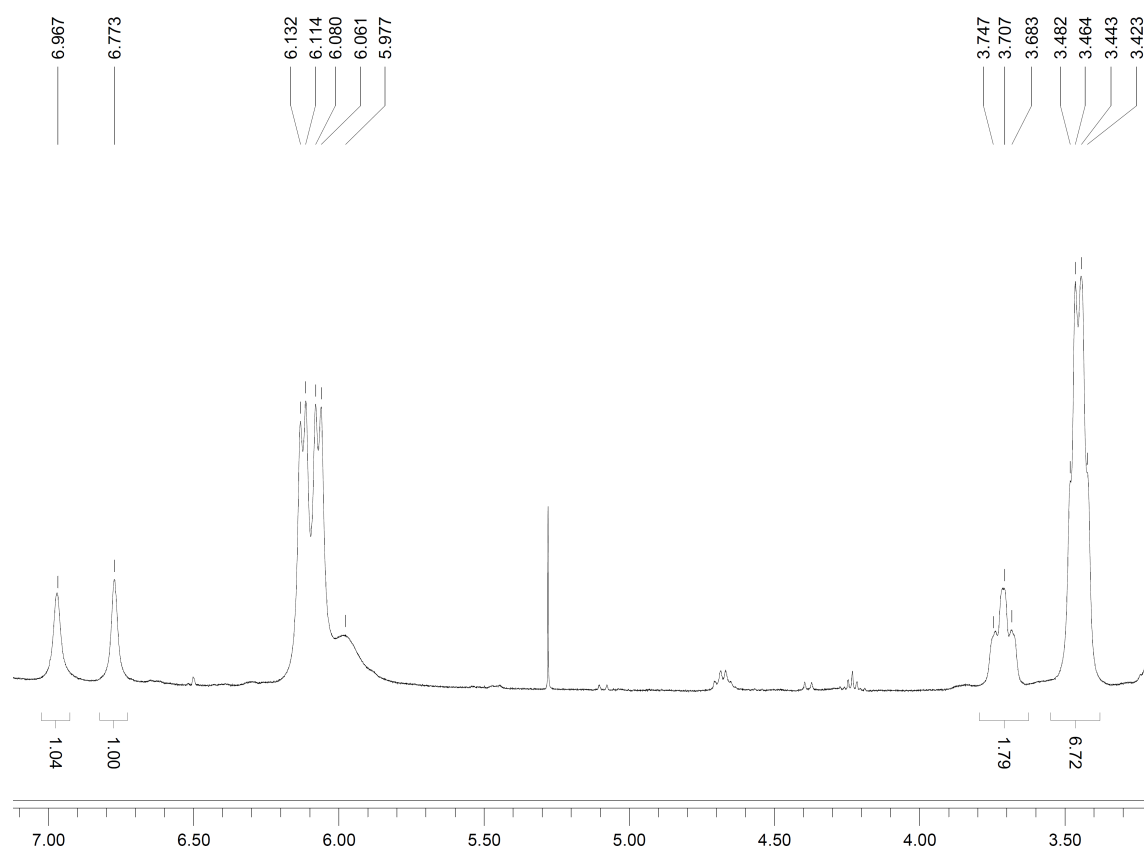

**Compound 3 - L-prolinol as catalyst in water**

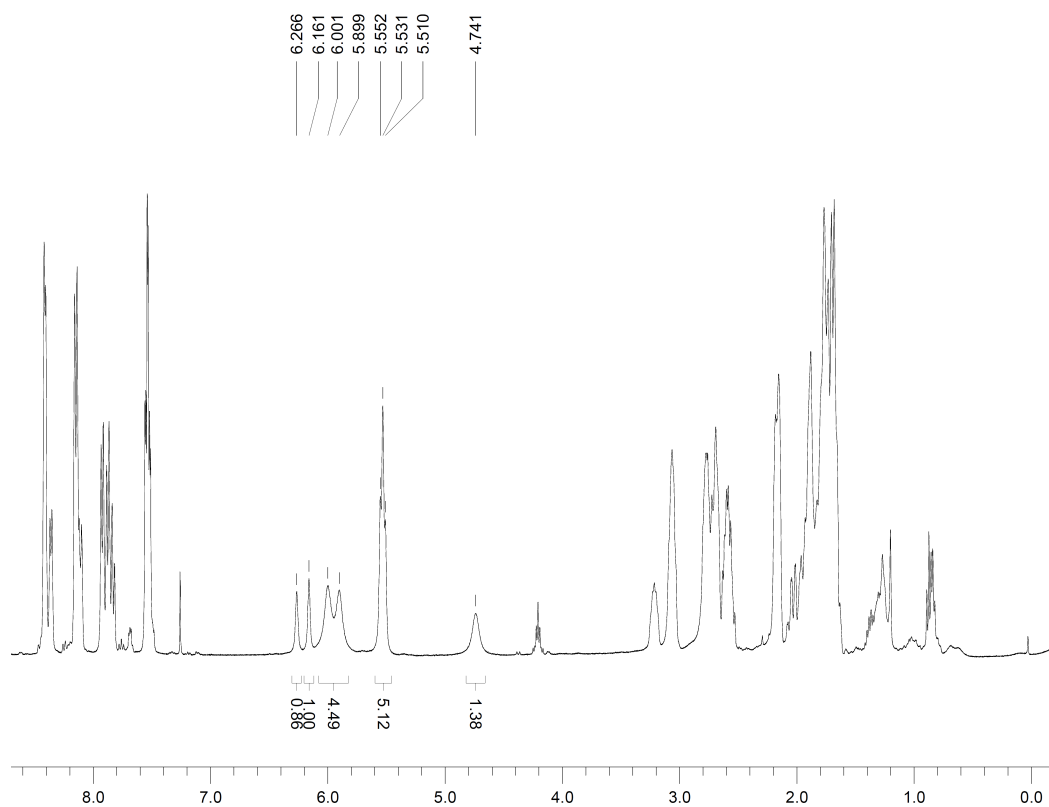

S40

**Compound 3 - Pyrrolidine as catalyst in water**

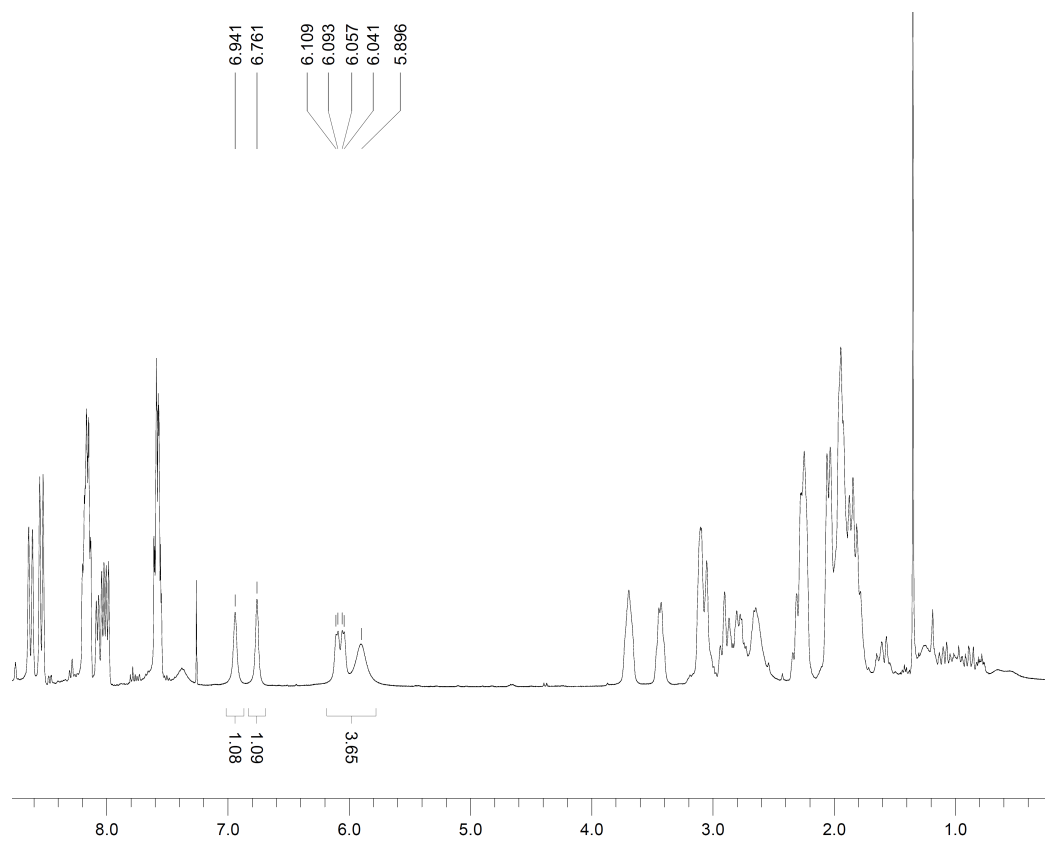

**Compound 3 - rac-pyrrolidinol as catalyst in water**

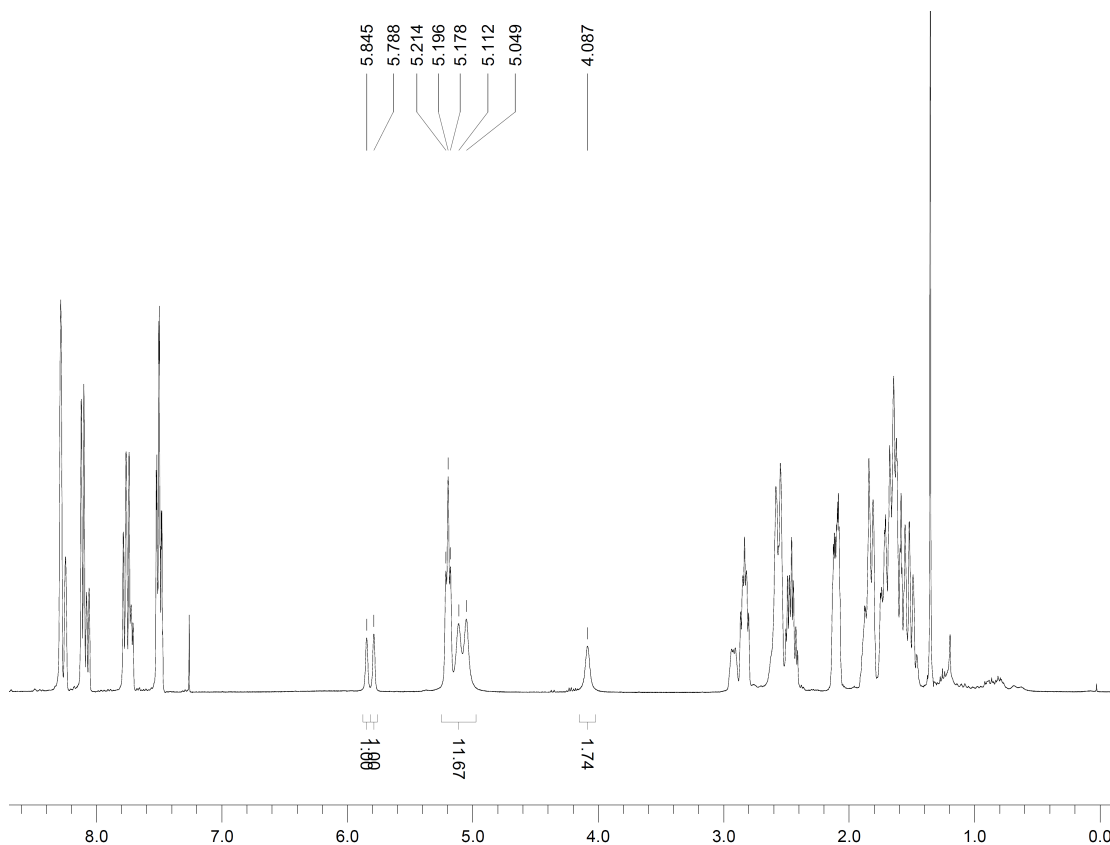

S41

**Compound 6 -(R)-3-pyrrolidinol as catalyst with methyl sugar 2a**

0.2 equiv. Eu

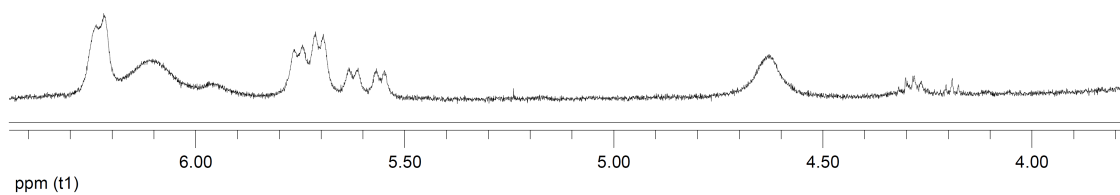

0.1 equiv. Eu

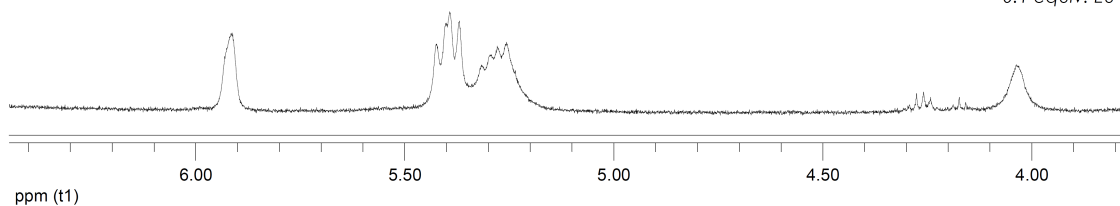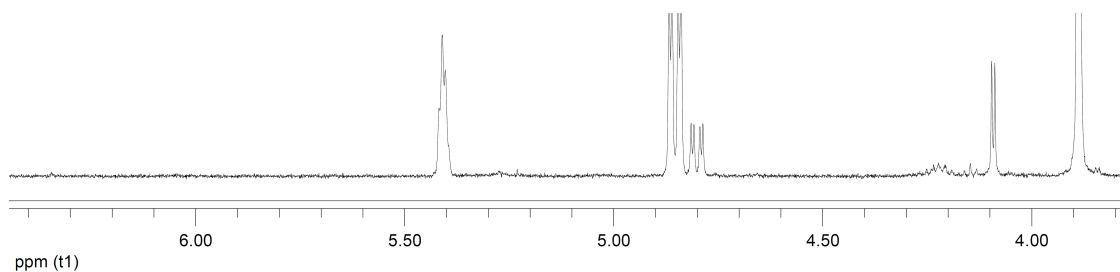

**Compound 6 -(R)-3-pyrrolidinol as catalyst with ethyl sugar 2b**

0.4 equiv. Eu

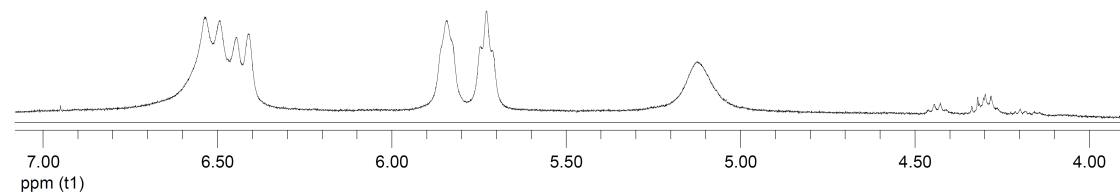

0.3 equiv. Eu

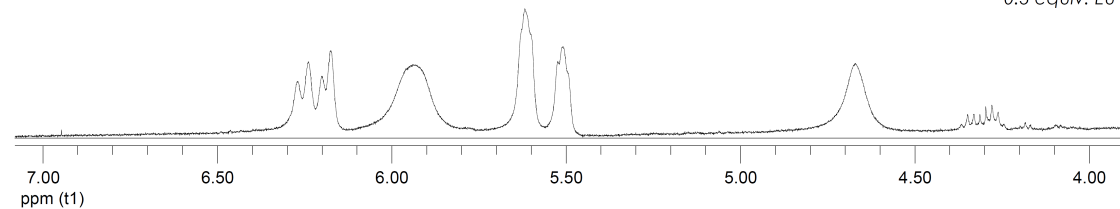

0.2 equiv. Eu

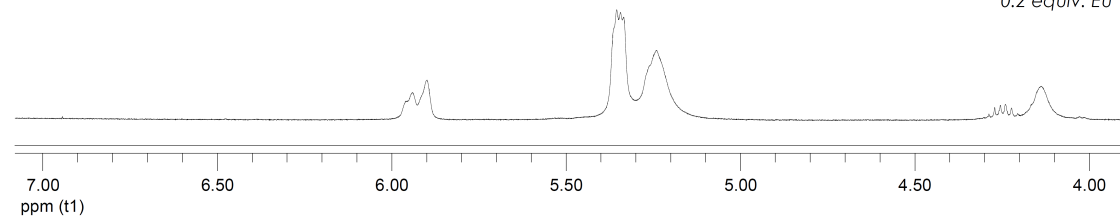

**Compound 6 -(R)-3-pyrrolidinol as catalyst with allyl sugar 2e**

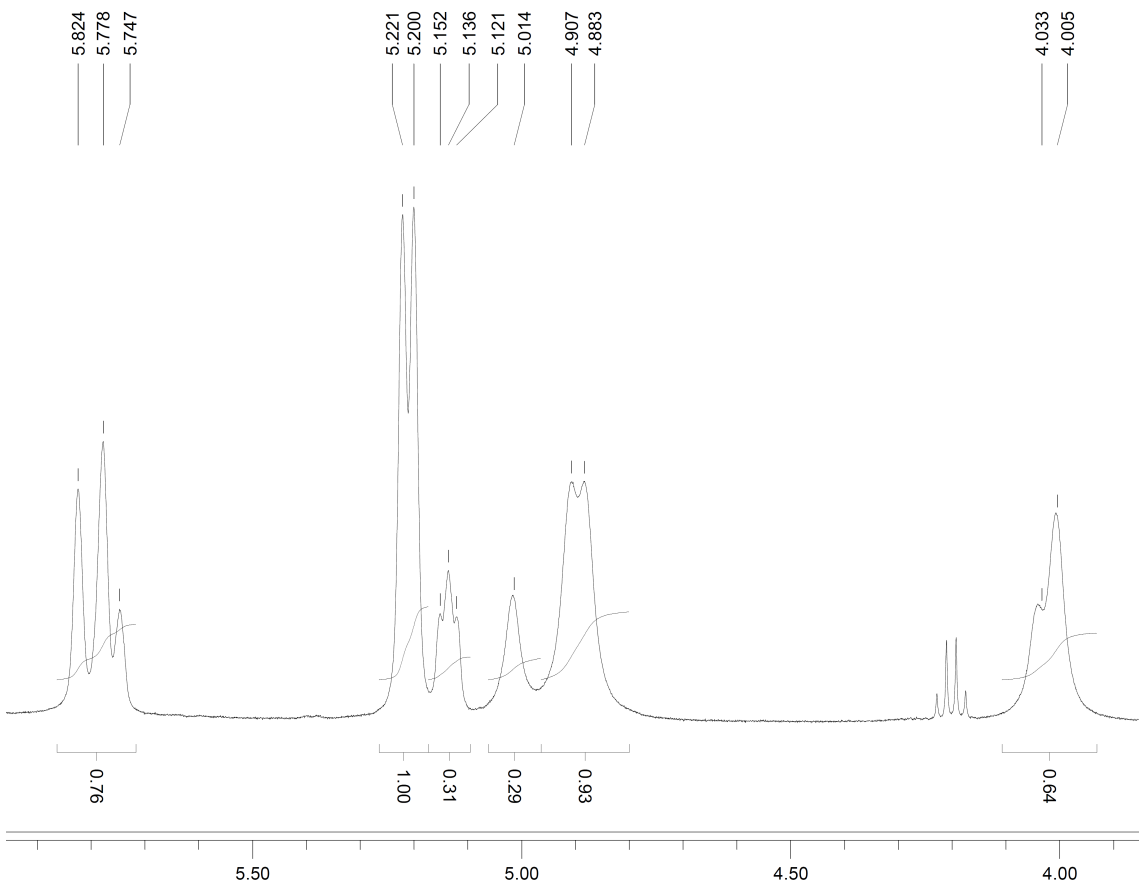



### NMR Study for Interaction of 2d, Cyclohexanone and the Catalyst

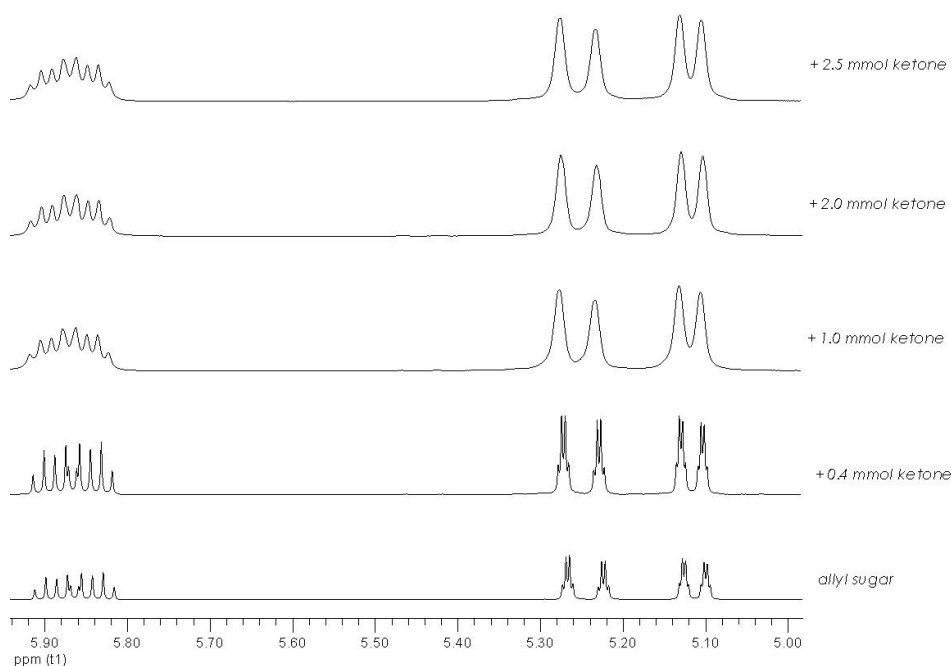

**Figure S1.** NMR study for the interaction between the sugar and (*R*)-3-pyrrolidinol (10 mol%) in the presence of increasing amounts of cyclohexanone. Only the signals of the allyl group in the sugar **2d** are shown.

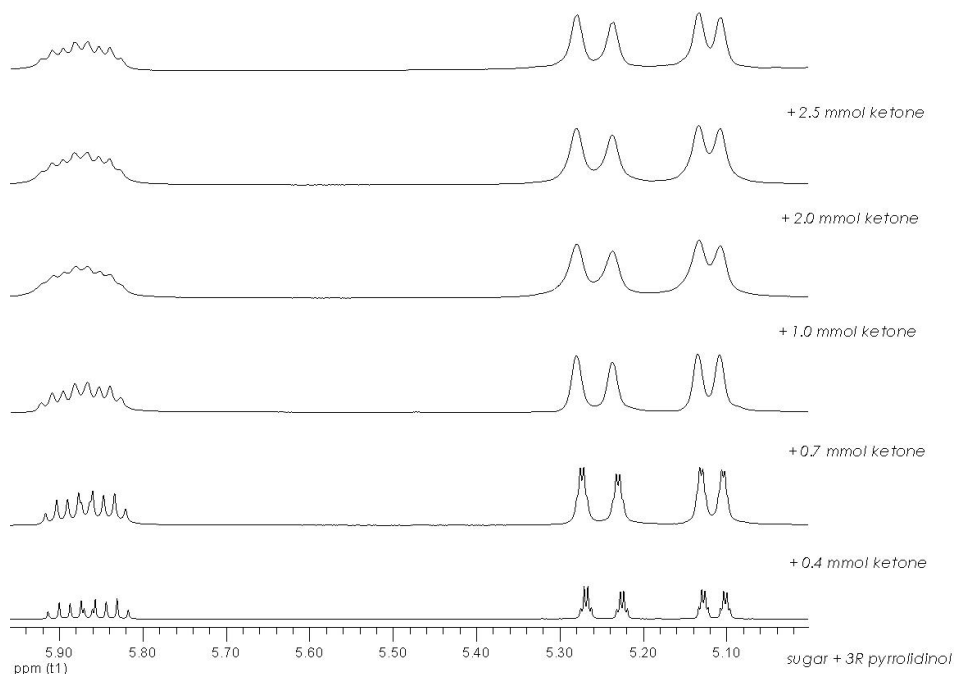

**Figure S2.** NMR study for the interaction between the sugar and different amounts of cyclohexanone. Only the signals of the allyl group in the sugar **2d** are shown.
